# Supplementary material
Source: PubMed Central journal article supplement (PMC6132224)
Supplement: NIHMS985268-supplement-Supporting_Info.pdf [file NIHMS985268-supplement-Supporting_Info.pdf]

# Supporting Information for

## Eucalyptusdimers A–C, Dimeric Phloroglucinol-Phellandrene Meroterpenoids from *Eucalyptus robusta*

Xu-Jie Qin,<sup>†,#</sup> Mi-Yan Feng,<sup>†,#</sup> Hui Liu,<sup>†</sup> Wei Ni,<sup>†</sup> Tyler Rauwolf,<sup>‡</sup> John A. Porco, Jr.,<sup>‡</sup> Huan Yan,<sup>†</sup> Li He,<sup>§</sup>  
and Hai-Yang Liu\*,<sup>†</sup>

<sup>†</sup>State Key Laboratory of Phytochemistry and Plant Resources in West China, Kunming Institute of Botany, Chinese Academy of Sciences, and Yunnan Key Laboratory of Natural Medicinal Chemistry, Kunming 650201, People's Republic of China

<sup>‡</sup>Department of Chemistry, Center for Molecular Discovery (BU-CMD), Boston University, 590 Commonwealth Avenue, Boston, Massachusetts 02215, United States

<sup>§</sup>Department of Dermatology, The First Affiliated Hospital of Kunming Medical University, Kunming 650032, People's Republic of China

---

## Contents

### Experimental Section

|                                                                                                                                  |         |
|----------------------------------------------------------------------------------------------------------------------------------|---------|
| General Experimental Procedures.....                                                                                             | S1      |
| Plant Material.....                                                                                                              | S1      |
| Extraction and Isolation.....                                                                                                    | S2      |
| Physical and Chemical Data of 1–4.....                                                                                           | S2      |
| Structure elucidation of 4 and Table S1 <sup>1</sup> H and <sup>13</sup> C NMR data of 4 in Acetone- <i>d</i> <sub>6</sub> ..... | S3      |
| Computational Methods and Results of 2–4.....                                                                                    | S4      |
| Bioassay Methods.....                                                                                                            | S5      |
| For compound 1.....                                                                                                              | S6–S9   |
| Figure S1. <sup>1</sup> H NMR Spectrum of Eucalyptusdimer A (1) in CDCl <sub>3</sub>                                             |         |
| Figure S2. <sup>1</sup> H NMR Spectrum of Eucalyptusdimer A (1) in CDCl <sub>3</sub>                                             |         |
| Figure S3. <sup>13</sup> C NMR Spectrum of Eucalyptusdimer A (1) in CDCl <sub>3</sub>                                            |         |
| Figure S4. HSQC Spectrum of Eucalyptusdimer A (1)                                                                                |         |
| Figure S5. HMBC Spectrum of Eucalyptusdimer A (1)                                                                                |         |
| Figure S6. <sup>1</sup> H– <sup>1</sup> H COSY Spectrum of Eucalyptusdimer A (1)                                                 |         |
| Figure S7. ROESY Spectrum of Eucalyptusdimer A (1)                                                                               |         |
| Figure S8. HRESIMS Spectrum of Eucalyptusdimer A (1)                                                                             |         |
| For compound 2.....                                                                                                              | S10–S13 |
| Figure S9. <sup>1</sup> H NMR Spectrum of Eucalyptusdimer B (2) in CDCl <sub>3</sub>                                             |         |
| Figure S10. <sup>1</sup> H NMR Spectrum of Eucalyptusdimer B (2) in CDCl <sub>3</sub>                                            |         |
| Figure S11. <sup>13</sup> C NMR Spectrum of Eucalyptusdimer B (2) in CDCl <sub>3</sub>                                           |         |
| Figure S12. HSQC Spectrum of Eucalyptusdimer B (2)                                                                               |         |
| Figure S13. HMBC Spectrum of Eucalyptusdimer B (2)                                                                               |         |
| Figure S14. <sup>1</sup> H– <sup>1</sup> H COSY Spectrum of Eucalyptusdimer B (2)                                                |         |

|                                                                                                     |         |
|-----------------------------------------------------------------------------------------------------|---------|
| <b>Figure S15.</b> ROESY Spetrum of Eucalyptusdimer B ( <b>2</b> )                                  |         |
| <b>Figure S16.</b> HRESIMS Spetrum of Eucalyptusdimer B ( <b>2</b> )                                |         |
| <b>For compound 3</b> .....                                                                         | S14–S17 |
| <b>Figure S17.</b> $^1\text{H}$ NMR Spetrum of Eucalyptusdimer C ( <b>3</b> ) in $\text{CDCl}_3$    |         |
| <b>Figure S18.</b> $^1\text{H}$ NMR Spetrum of Eucalyptusdimer C ( <b>3</b> ) in $\text{CDCl}_3$    |         |
| <b>Figure S19.</b> $^{13}\text{C}$ NMR Spetrum of Eucalyptusdimer C ( <b>3</b> ) in $\text{CDCl}_3$ |         |
| <b>Figure S20.</b> HSQC Spetrum of Eucalyptusdimer C ( <b>3</b> )                                   |         |
| <b>Figure S21.</b> HMBC Spetrum of Eucalyptusdimer C ( <b>3</b> )                                   |         |
| <b>Figure S22.</b> $^1\text{H}$ – $^1\text{H}$ COSY Spetrum of Eucalyptusdimer C ( <b>3</b> )       |         |
| <b>Figure S23.</b> ROESY Spetrum of Eucalyptusdimer C ( <b>3</b> )                                  |         |
| <b>Figure S24.</b> HRESIMS Spetrum of Eucalyptusdimer C ( <b>3</b> )                                |         |
| <b>For compound 4</b> .....                                                                         | S18–S20 |
| <b>Figure S25.</b> $^1\text{H}$ NMR Spetrum of Eucalyprobusone A ( <b>4</b> ) in Acetone- $d_6$     |         |
| <b>Figure S26.</b> $^{13}\text{C}$ NMR Spetrum of Eucalyprobusone A ( <b>4</b> ) in Acetone- $d_6$  |         |
| <b>Figure S27.</b> HSQC Spetrum of Eucalyprobusone A ( <b>4</b> )                                   |         |
| <b>Figure S28.</b> HMBC Spetrum of Eucalyprobusone A ( <b>4</b> )                                   |         |
| <b>Figure S29.</b> $^1\text{H}$ – $^1\text{H}$ COSY Spetrum of Eucalyprobusone A ( <b>4</b> )       |         |
| <b>Figure S30.</b> HRESIMS Spetrum of Eucalyprobusone A ( <b>4</b> )                                |         |
| Computational Data for <b>1–4</b> .....                                                             | S21–S30 |

## Experimental Section

### General Experiment Procedures

Optical rotations were determined on a Jasco P-1020 polarimeter. ECD spectra were recorded on an Applied Photophysics spectropolarimeter. UV spectra were taken on a Shimadzu UV2401 PC spectrophotometer. IR spectra were determined on a Bruker FT-IR Tensor-27 infrared spectrophotometer with KBr discs. HRESIMS were measured using an Agilent G6230 TOF-MS mass spectrometer. X-ray diffraction was conducted using Bruker APEX DUO diffractometer with graphite-monochromated CuK $\alpha$  radiation. 1D and 2D NMR spectra were obtained by Bruker DRX-500 or Avance III 600 spectrometers. Semi-preparative HPLC was performed on an Agilent 1260 instrument with a ZORBAX SBC18 column (9.4  $\times$  250 mm, 5  $\mu$ m) or an Agilent 1100 instrument with a CHIRALPAK IC column (10  $\times$  250 mm, 5  $\mu$ m). Sephadex LH-20 (GE Chemical Corporation), silica gel (200–300 mesh, Qingdao Marine Chemical Factory, Qingdao, People's Republic of China), and RP-18 (50  $\mu$ m, Merck, Germany) were used for column chromatography (CC).

### Plant Material

*Eucalyptus robusta* fruits identified by Dr. Rong Li (Kunming Institute of Botany, CAS) were collected from Kunming, Yunnan Province, China, in October 2015. A voucher specimen (HY0032) has been already deposited in the State Key Laboratory of Phytochemistry and Plant Resources in West China, Kunming Institute of Botany, Chinese Academy of Sciences.

### Extraction and Isolation

The air-dried and powder fruits (5.0 kg) were extracted with PE-ethyl acetate (1:1 v/v, 15 L  $\times$  3, each 24 h) at room temperature to afford the crude extract after solvent evaporation under reduced pressure. This extract (230) was then chromatographed over silica gel and eluted with petroleum ether (PE)–EtOAc gradient solvent (100:1  $\rightarrow$  1:1, v/v). Combination of similar fractions based on TLC analysis gave six fractions (Fr.A–Fr.F). Fr.E (10.5 g) was separated by column chromatography over Sephadex LH-20 (CHCl<sub>3</sub>–MeOH, 3:2 v/v) to obtain four subfractions (Fr.E<sub>1</sub>–Fr.E<sub>4</sub>). Fr.E<sub>1</sub> (135 mg) was further purified by preparative HPLC (MeOH–H<sub>2</sub>O, 5 mL/min) to give **1** (15.0 mg), **2** (12.0 mg), and **3** (2.5 mg). Fr.E<sub>4</sub> (1.2 g) was subjected to an RP-18 column (MeOH–H<sub>2</sub>O, 40:60  $\rightarrow$  80:20 v/v) to give **4** (35 mg) and three other subfractions. Compound **4** (3.0 mg) was then successively separated by chiral semi-preparative HPLC with *n*-hexane–2-propanol–CF<sub>3</sub>COOH (98:2:0.05 v/v, 3.0 mL/min) to yield (+)-**4** (1.0 mg) and (–)-**4** (1.0 mg).

## The physical data of 1–4

**Eucalyptusdimer A (1):** light yellow needle crystals (CHCl<sub>3</sub>–MeOH, 1:3 v/v);  $[\alpha]_D^{17}$  –56.2 (*c* 0.15, MeOH); UV (MeOH)  $\lambda_{\max}(\log \epsilon)$  204 (4.36), 219 (4.28), 305 (4.29) nm; ECD (MeOH)  $\lambda_{\max}$  237 ( $\Delta\epsilon$  –1.38), 251 ( $\Delta\epsilon$  –0.94), 267 ( $\Delta\epsilon$  +0.24), 321 ( $\Delta\epsilon$  –1.90), 339 ( $\Delta\epsilon$  –0.91), 345 ( $\Delta\epsilon$  –1.00) nm; IR (KBr)  $\nu_{\max}$  3445, 2961, 1627, 1456, 1263, 1025 cm<sup>–1</sup>; <sup>1</sup>H and <sup>13</sup>C NMR data, see Table 1; HRESIMS *m/z* 737.4028 [M + Na]<sup>+</sup> (calcd for C<sub>44</sub>H<sub>58</sub>O<sub>8</sub>Na, 737.4029).

**Eucalyptusdimer B (2):** light yellow amorphous powder;  $[\alpha]_D^{17}$  +45.4 (*c* 0.13, MeOH); UV (MeOH)  $\lambda_{\max}(\log \epsilon)$  204 (4.35), 219 (4.28), 305 (4.29) nm; ECD (MeOH)  $\lambda_{\max}$  231 ( $\Delta\epsilon$  +18.43), 260 ( $\Delta\epsilon$  +0.44), 296 ( $\Delta\epsilon$  +5.79), 344 ( $\Delta\epsilon$  +1.59) nm; IR (KBr)  $\nu_{\max}$  3445, 2963, 1626, 1456, 1261, 1025 cm<sup>–1</sup>; <sup>1</sup>H and <sup>13</sup>C NMR data, see Table 1; HRESIMS *m/z* 737.4023 [M + Na]<sup>+</sup> (calcd for C<sub>44</sub>H<sub>58</sub>O<sub>8</sub>Na, 737.4029).

**Eucalyptusdimer C (3):** light yellow amorphous powder;  $[\alpha]_D^{20}$  –100.6 (*c* 0.12, MeOH); UV (MeOH)  $\lambda_{\max}(\log \epsilon)$  203 (4.41), 219 (4.36), 305 (4.38) nm; ECD (MeOH)  $\lambda_{\max}$  243 ( $\Delta\epsilon$  +3.25), 251 ( $\Delta\epsilon$  –2.69), 267 ( $\Delta\epsilon$  +0.21), 318 ( $\Delta\epsilon$  –8.77) nm; IR (KBr)  $\nu_{\max}$  3447, 2962, 1626, 1455, 1261, 1025 cm<sup>–1</sup>; <sup>1</sup>H and <sup>13</sup>C NMR data, see Table S1; HRESIMS *m/z* 727.4208 [M – H]<sup>–</sup> (calcd for C<sub>45</sub>H<sub>59</sub>O<sub>8</sub>, 727.4210).

**Eucalyprobusone A (4):** light yellow amorphous powder;  $[\alpha]_D^{25}$  +119.3 (*c* 0.10, MeOH) for (+)-**4**,  $[\alpha]_D^{25}$  –124.2 (*c* 0.10, MeOH) for (–)-**4**; UV (MeOH)  $\lambda_{\max}(\log \epsilon)$  205 (4.49), 295 (4.65) nm; ECD (MeOH)  $\lambda_{\max}$  230 ( $\Delta\epsilon$  –7.46), 267 ( $\Delta\epsilon$  –0.68), 298 ( $\Delta\epsilon$  +7.59), 352 ( $\Delta\epsilon$  –2.51) nm for (+)-**4**, ECD (MeOH)  $\lambda_{\max}$  230 ( $\Delta\epsilon$  +9.87), 267 ( $\Delta\epsilon$  –0.56), 299 ( $\Delta\epsilon$  –10.0), 350 ( $\Delta\epsilon$  +3.15) nm for (–)-**4**; <sup>1</sup>H and <sup>13</sup>C NMR data, see Table S2; HRESIMS *m/z* 499.1345 [M + K]<sup>+</sup> (calcd for C<sub>24</sub>H<sub>28</sub>O<sub>9</sub>K, 499.1365).

**Crystallographic Data of 1:** C<sub>44</sub>H<sub>58</sub>O<sub>8</sub>•CHCl<sub>3</sub>, M = 834.27, orthorhombic, *a* = 11.7225(2) Å, *b* = 15.0056(2) Å, *c* = 24.7900(3) Å,  $\alpha = 90^\circ$ ,  $\beta = 90^\circ$ ,  $\gamma = 90^\circ$ , *V* = 4360.64(11) Å<sup>3</sup>, *Z* = 4, *T* = 100(2) K,  $\mu(\text{CuK}\alpha) = 2.315$  mm<sup>–1</sup>, *D*<sub>calc</sub> = 1.271 g/cm<sup>3</sup>, 23721 reflections measured, 7653 independent reflections (*R*<sub>int</sub> = 0.0423). The final *R*<sub>1</sub> values were 0.0659 (*I* > 2σ(*I*)). The final *wR*(*F*<sup>2</sup>) values were 0.1794 (*I* > 2σ(*I*)). The final *R*<sub>*I*</sub> values were 0.0702 (all data). The final *wR*(*F*<sup>2</sup>) values were 0.1843 (all data). The goodness of fit on *F*<sup>2</sup> was 1.030. Flack parameter = 0.045(6).

## Structure elucidation of **4**

Eucalyprobusone A (**4**) had a molecular formula of  $C_{24}H_{28}O_9$  as determined by the HRESIMS ion at  $m/z$  499.1345  $[M + K]^+$  (calcd for  $C_{24}H_{28}O_9K$ , 499.1365), implying ten degrees of unsaturation. The gross structure of **4** was achieved to be a biogenetically related intermediate of **1–3** by the  $^1H-^1H$  COSY and HMBC analyses. According to the fact that **1** and **2** were C-9 epimers, **4** was thus a racemic mixture as proved by chiral analysis. Finally, the ECD calculation allowed the establishment of the absolute configurations as *9S* for (+)-**4** and *9R* for (–)-**4**.

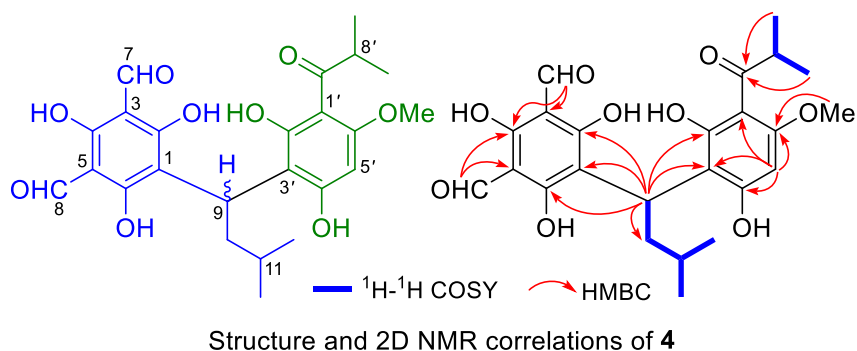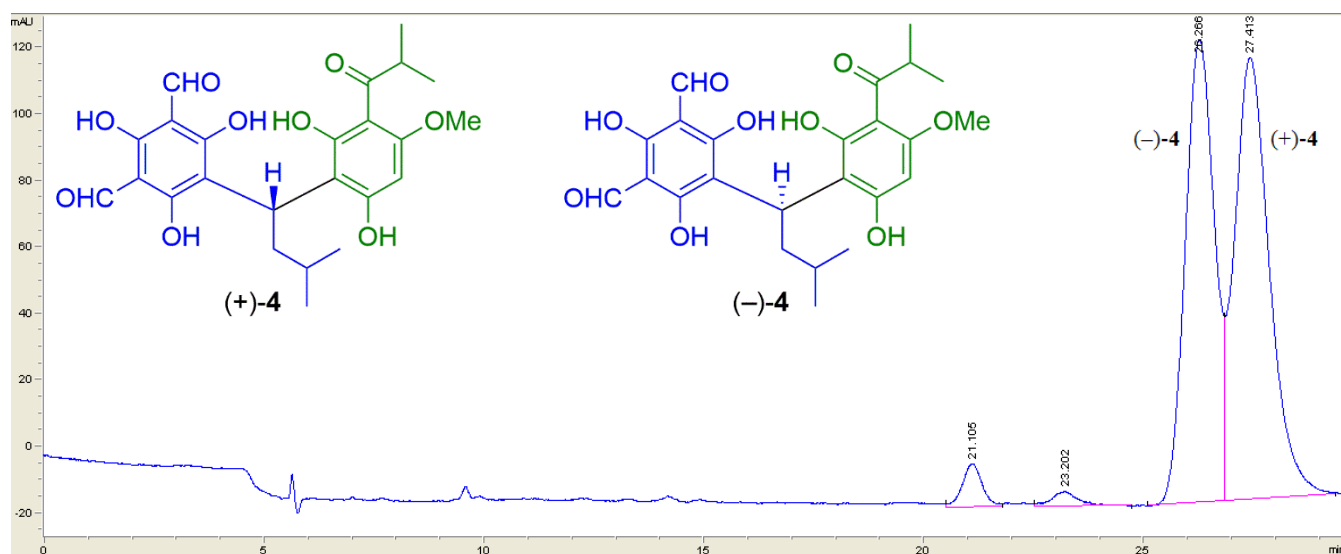

**Table S1.**  $^1H$  (500 MHz) and  $^{13}C$  (125 MHz) NMR data of Eucalyprobusone A (**4**) in Acetone- $d_6$

| no. | $\delta_C$       | $\delta_H$ (mult., <i>J</i> in Hz) | no.    | $\delta_C$ | $\delta_H$ (mult., <i>J</i> in Hz) |
|-----|------------------|------------------------------------|--------|------------|------------------------------------|
| 1   | 108.9            |                                    | 1'     | 104.6      |                                    |
| 2/6 | $164.2 \times 2$ |                                    | 2'     | 166.3      |                                    |
| 3/5 | $104.9 \times 2$ |                                    | 3'     | 110.1      |                                    |
| 4   | 168.9            |                                    | 4'     | 162.8      |                                    |
| 7/8 | 193.1            | $10.08 \times 2$ s                 | 5'     | 92.9       | 6.22 s                             |
| 9   | 26.7             | 5.27 t (8.4)                       | 6'     | 162.8      |                                    |
| 10a | 41.2             | 2.20 ddd (15.2, 9.2, 6.1)          | 7'     | 211.8      |                                    |
| 10b |                  | 1.79 dt (13.5, 6.8)                | 8'     | 40.0       | 3.82 sext. (6.8)                   |
| 11  | 27.1             | 1.46 m                             | 9'     | 19.5       | 1.13 d (6.8)                       |
| 12  | 22.4             | 0.87 d (6.6)                       | 10'    | 19.6       | 1.13 d (6.8)                       |
| 13  | 23.2             | 0.93 d (6.6)                       | OMe-6' | 56.2       | 3.90 s                             |

## Computational Methods and Results

Theoretical calculations of ECD spectra for compounds **1–4** were performed with the Gaussian 09 program package. The calculation of **1–4** were based on their crystal data, geometries and energy structures. The geometry was optimized with MM2 at the first time, and then reoptimized at the b3lyp/6-31g(d,p) level of theory. The ECD computation of compounds **1–4** were performed with DFT calculations at the B3LYP/6-311++G(2d,p) level. Their absolute configurations were determined as  $(7S,9R,1'R,4'R,6'R,1''R,4''R,6''R)$ -**1**,  $(7S,9S,1'R,4'R,6'R,1''R,4''R,6''R)$ -**2**,  $(7S,9R,1'R,4'R,6'R,1''R,4''R,6''R,8'''S)$ -**3**,  $(9S)$ - $(+)$ -**4**, and  $(9R)$ - $(-)$ -**4**, respectively.

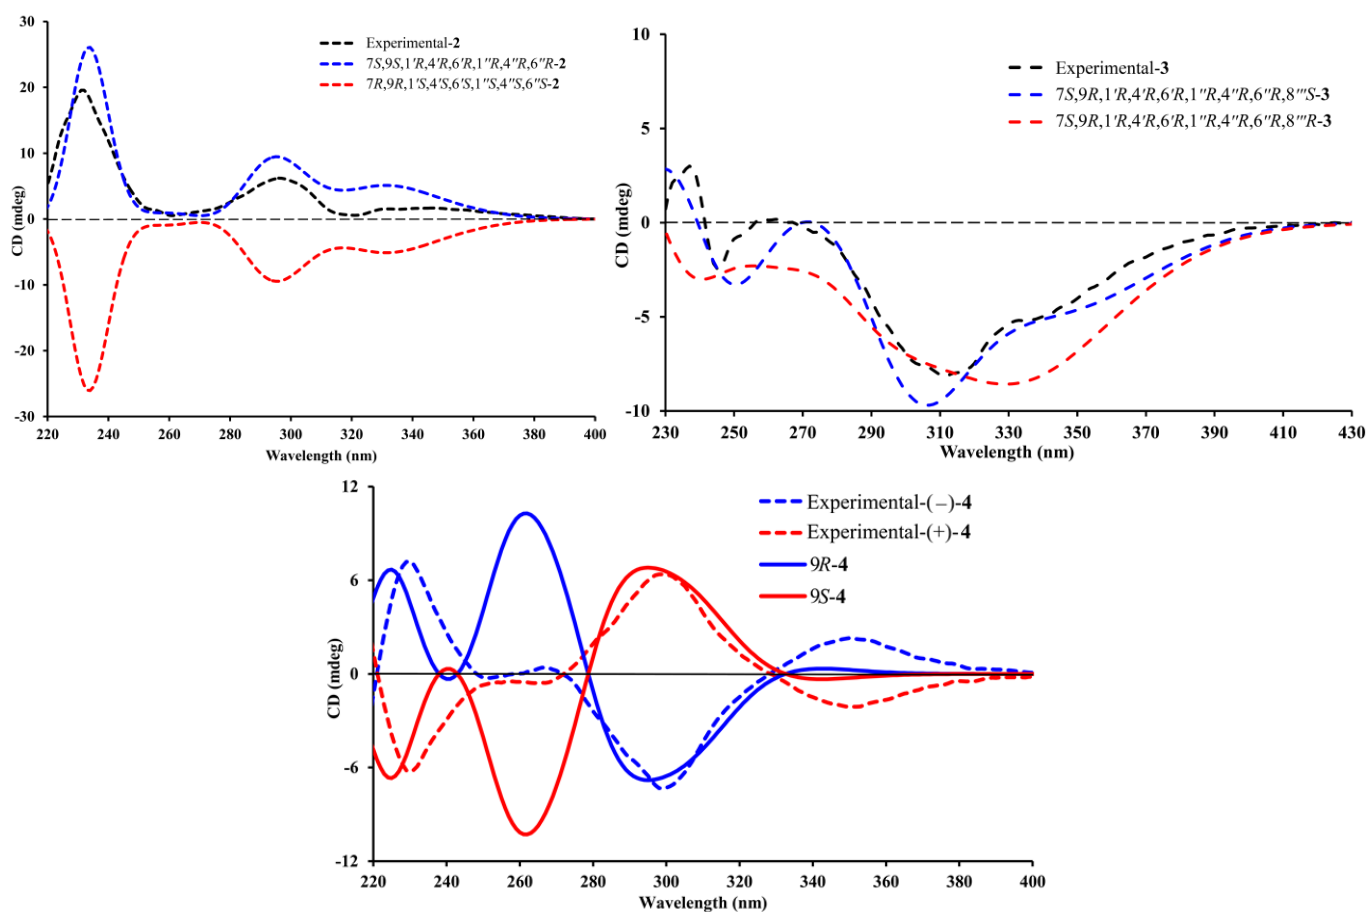

**Figure S1.** Calculated and experimental ECD spectra of **2–4**

## Bioactivity Assays

### Anti-inflammatory Assay

Murine monocytic RAW264.7 macrophages were dispensed into 96-well plates ( $2 \times 10^5$  cells/well) containing RPMI 1640 medium (HyClone) with 10% FBS under a humidified atmosphere with 5% CO<sub>2</sub> at 37 °C. After 24 h of preincubation, cells were treated with serial dilutions of the test compounds, up to a maximum concentration of 50 μM, with the presence of 1.0 μg/mL LPS for 18 h. The compounds were dissolved in DMSO and further diluted in medium to produce different concentrations. NO production in each well was assessed by adding 100 μL of Griess reagent (reagent A and reagent B, Sigma) to 100 μL of each supernatant from the LPS (Sigma)-treated or LPS- and compound-treated cells in triplicate. After a 5 min incubation, the absorbance of samples was measured at 570 nm with a 2104 Envision multilabel plate reader (Perkin-Elmer Life Sciences, Inc., Boston, MA, USA). L-N<sup>G</sup>-monomethyl arginine (L-NMMA) was used as a positive control.

### PTP1B Inhibitory Assay

Briefly, 30 nM PTP1B (protein tyrosine phosphatase-1B), 50 mM 3-[N-morpholino]propanesulfonic acid (MOPs) buffer (pH 6.5), and 60 μM IR5 (insulin receptor) were successively added to each well of a 96-well plate with or without test compounds (50 μM, 100 μL for each well). The reaction was terminated with Red reagent (phosphoric acid test reagent) after incubation at 30 °C for 30 min, and then it was incubated for another 20 min at 30 °C. The OD values were tested by a microplate reader at 620 nm. The percentage inhibition was calculated as follows: inhibition (%) =  $(1 - \text{experimental OD}/\text{blank OD}) \times 100$ . Suramin, a known phosphatase inhibitor, was used as a positive control.

**Table S2. PTP1B Inhibitory Effects of 1–4 (50 μM)**

| Compounds           | Suramin | 1     | 2     | 3     | 4     | (+)-4 |
|---------------------|---------|-------|-------|-------|-------|-------|
| Inhibitory rate (%) | 90.79   | 10.95 | 21.16 | 22.34 | 17.08 | 4.25  |
| SD                  | 0.06    | 1.41  | 1.87  | 2.42  | 0.72  | 1.46  |

### AChE Inhibitory Assay

AChE (acetylcholinesterase) inhibitory effects of 1–3 were evaluated by the spectrophotometric method<sup>1</sup> with slightly modification. All these meroterpenoids were dissolved in DMSO. The reaction mixture (totally 200 μL) containing phosphate buffer (pH = 8.0), 1–3 (50 μM), and acetyl cholinesterase (0.02 U/mL), was incubated for 20 min at 37 °C. Then, the reaction was initiated by the addition of 40 μL of solution containing DTNB (0.625 mM) and acetylthiocholine iodide (0.625 mM) for AChE inhibitory activity assay, respectively. The hydrolysis of acetylthiocholine was monitored at 405 nm every 30 seconds for an hour. All the reactions were performed in triplicate. The percentage inhibition was calculated as follows: inhibition (%) =  $(E - S)/E \times 100$  (E is the activity of the enzyme without 1–3 and S is the activity of enzyme with 1–3).

1. Ellman, G. L.; Courtney, K. D.; Andres, V. J.; Featherstone, R. M. *Biochem. Pharmacol.* **1961**, 7, 88–95.

**Table S3. AChE Inhibitory Effects of 1–4 (50 μM)**

| Compounds           | 1     | 2     | 3     | 4     | (+)-4 | (-)-4 |
|---------------------|-------|-------|-------|-------|-------|-------|
| Inhibitory rate (%) | 75.85 | 43.79 | 38.16 | 84.21 | 75.73 | 78.06 |
| SD                  | 1.64  | 1.64  | 1.50  | 1.20  | 0.61  | 0.70  |

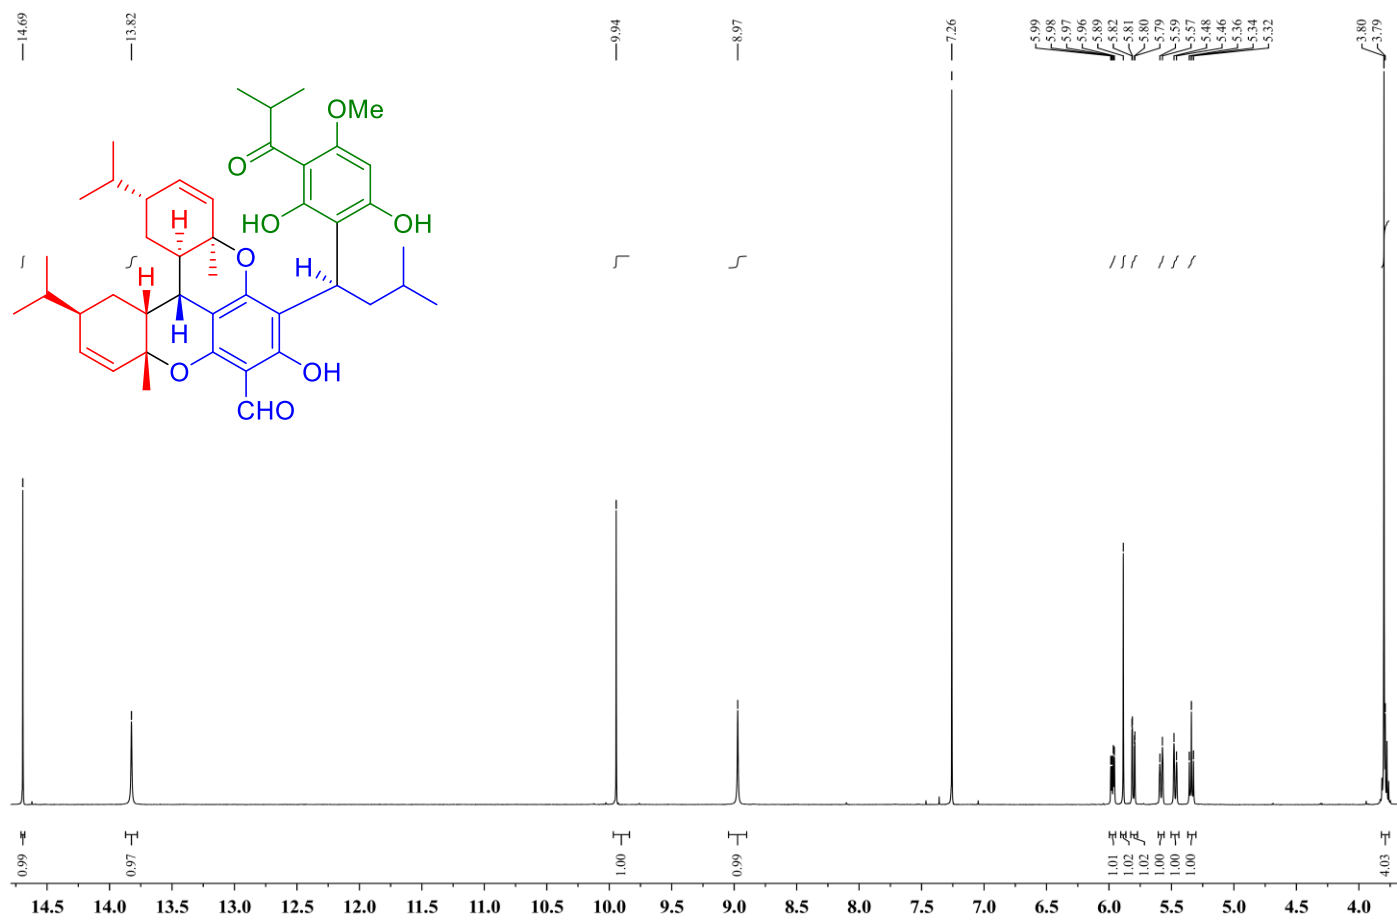

**Figure S2**  $^1\text{H}$  NMR Spectrum of Eucalyptusdimer A (**1**) in  $\text{CDCl}_3$

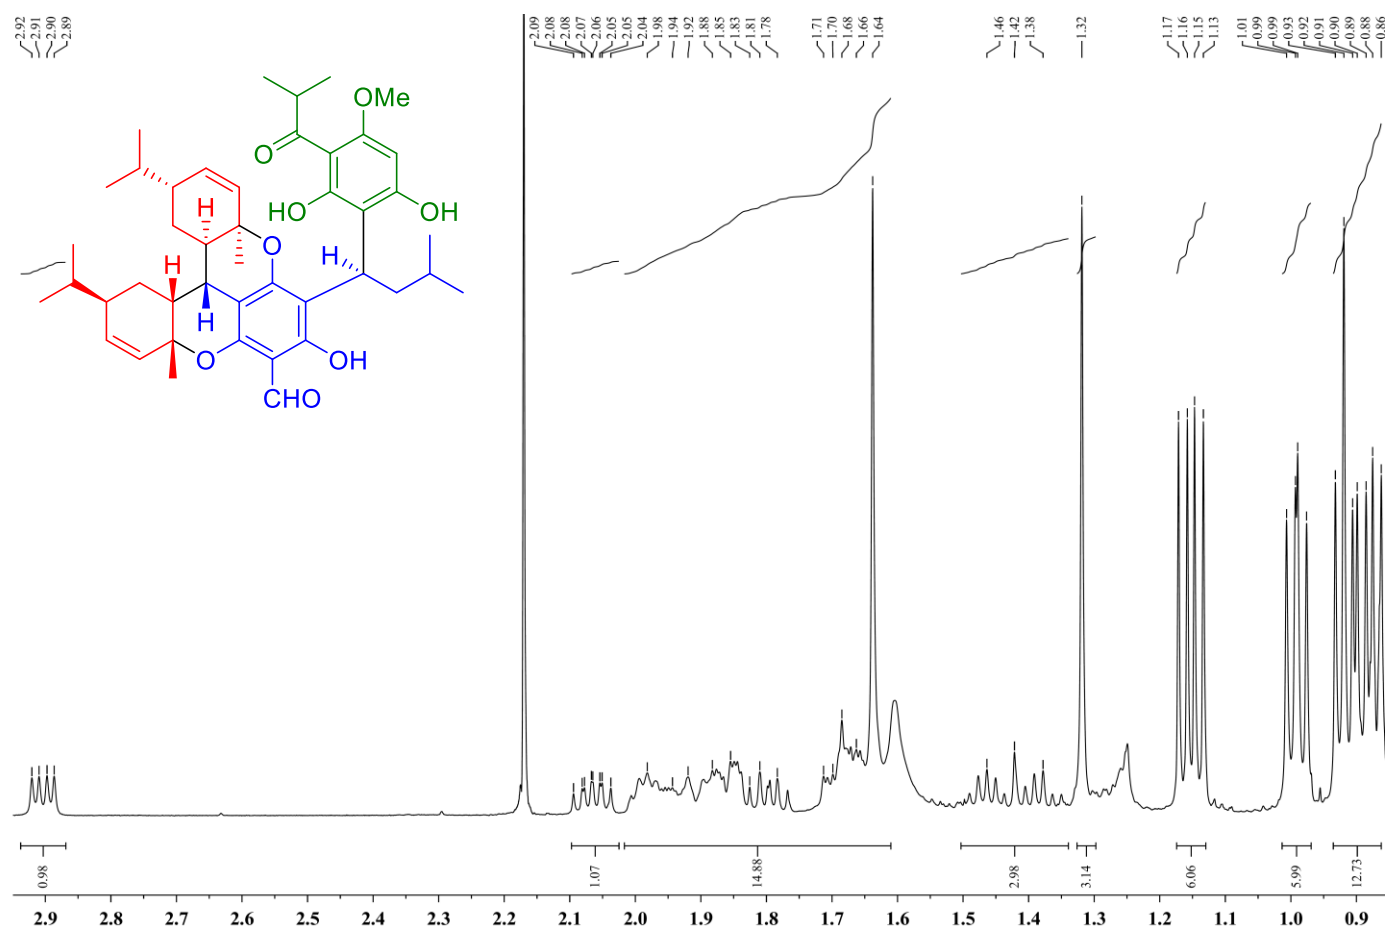

**Figure S3**  $^1\text{H}$  NMR Spectrum of Eucalyptusdimer A (**1**) in  $\text{CDCl}_3$



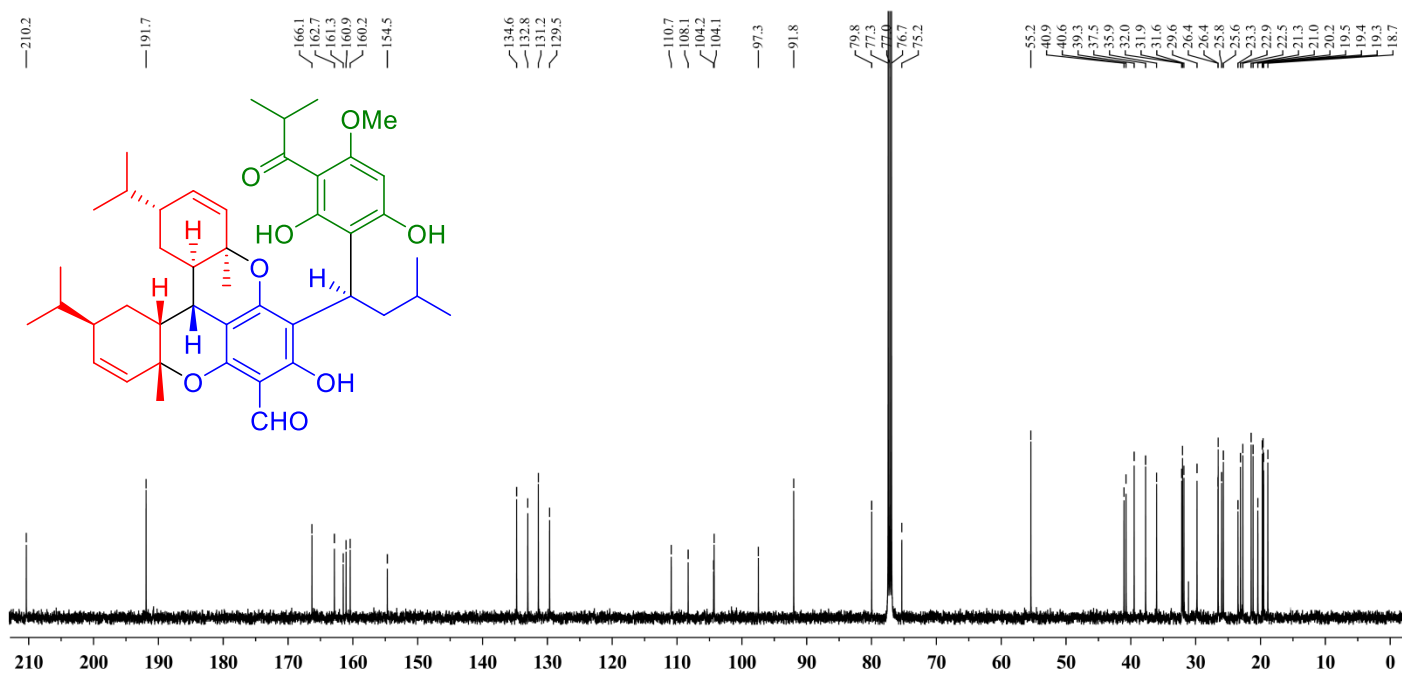

**Figure S4**  $^{13}\text{C}$  NMR Spectrum of Eucalyptusdimer A (**1**) in  $\text{CDCl}_3$

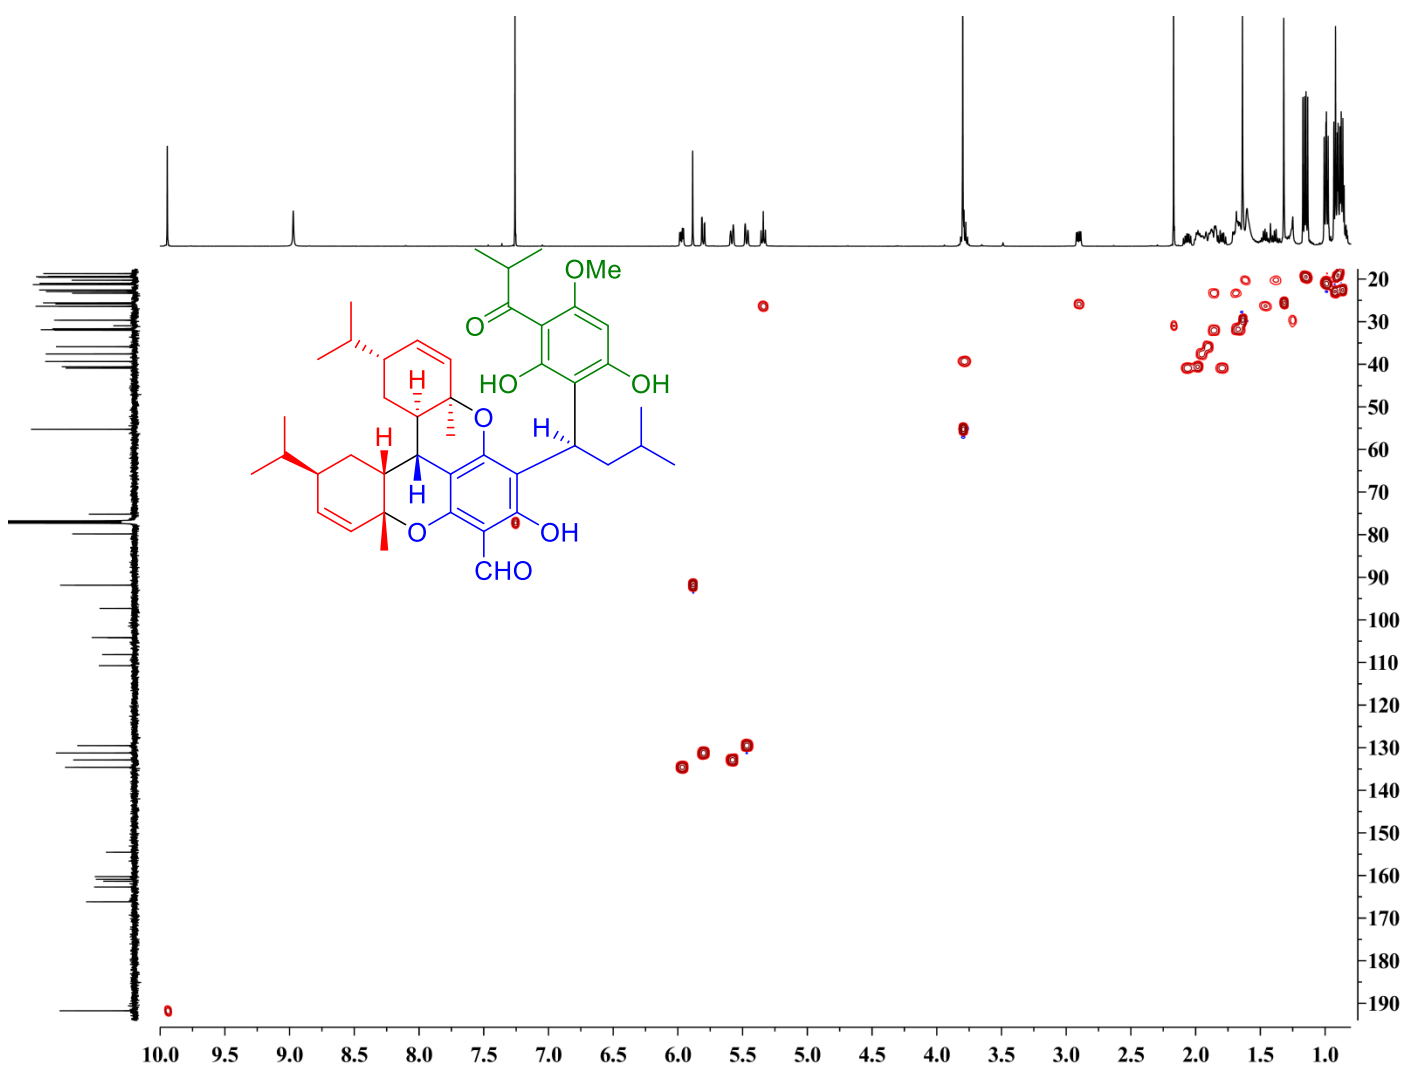

**Figure S5** HSQC Spectrum of Eucalyptusdimer A (**1**)

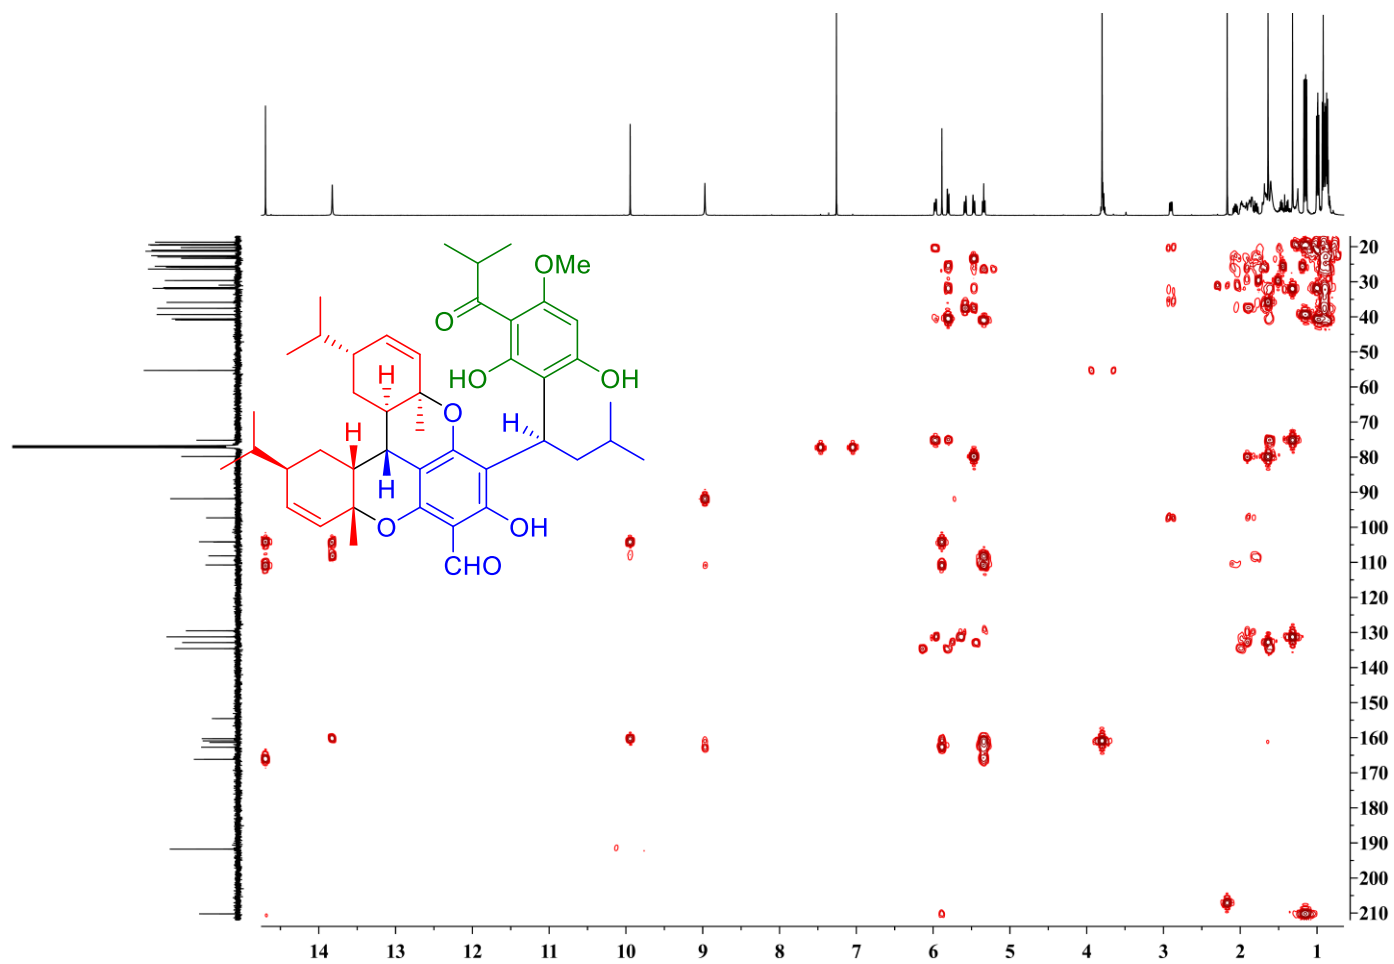

Figure S6 HMBC Spectrum of Eucalyptusdimer A (1)

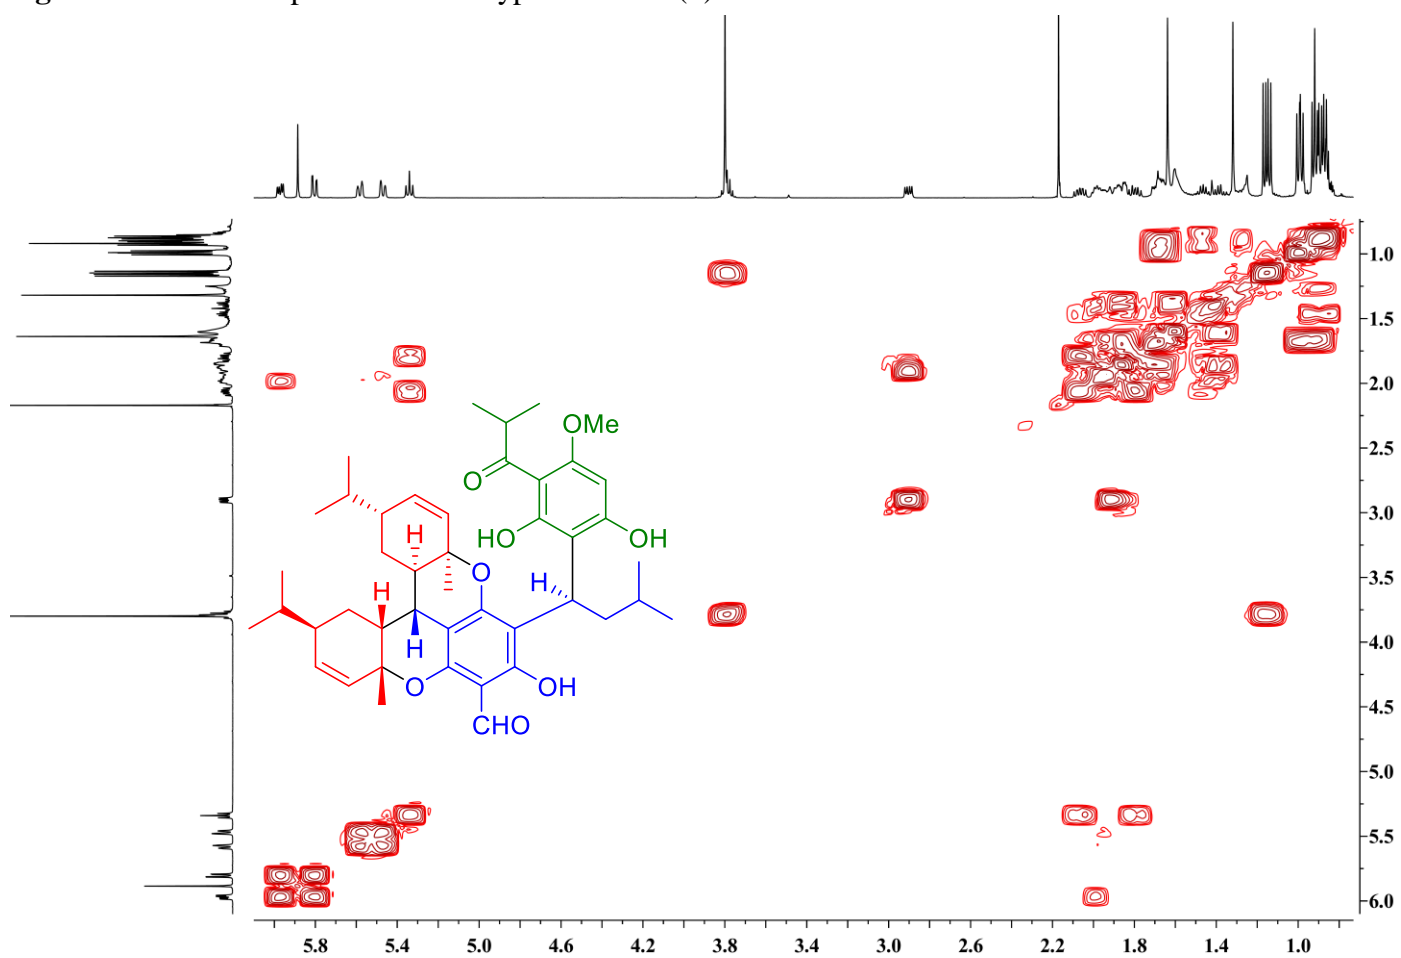

Figure S7  $^1\text{H}$ - $^1\text{H}$  COSY Spectrum of Eucalyptusdimer A (1)

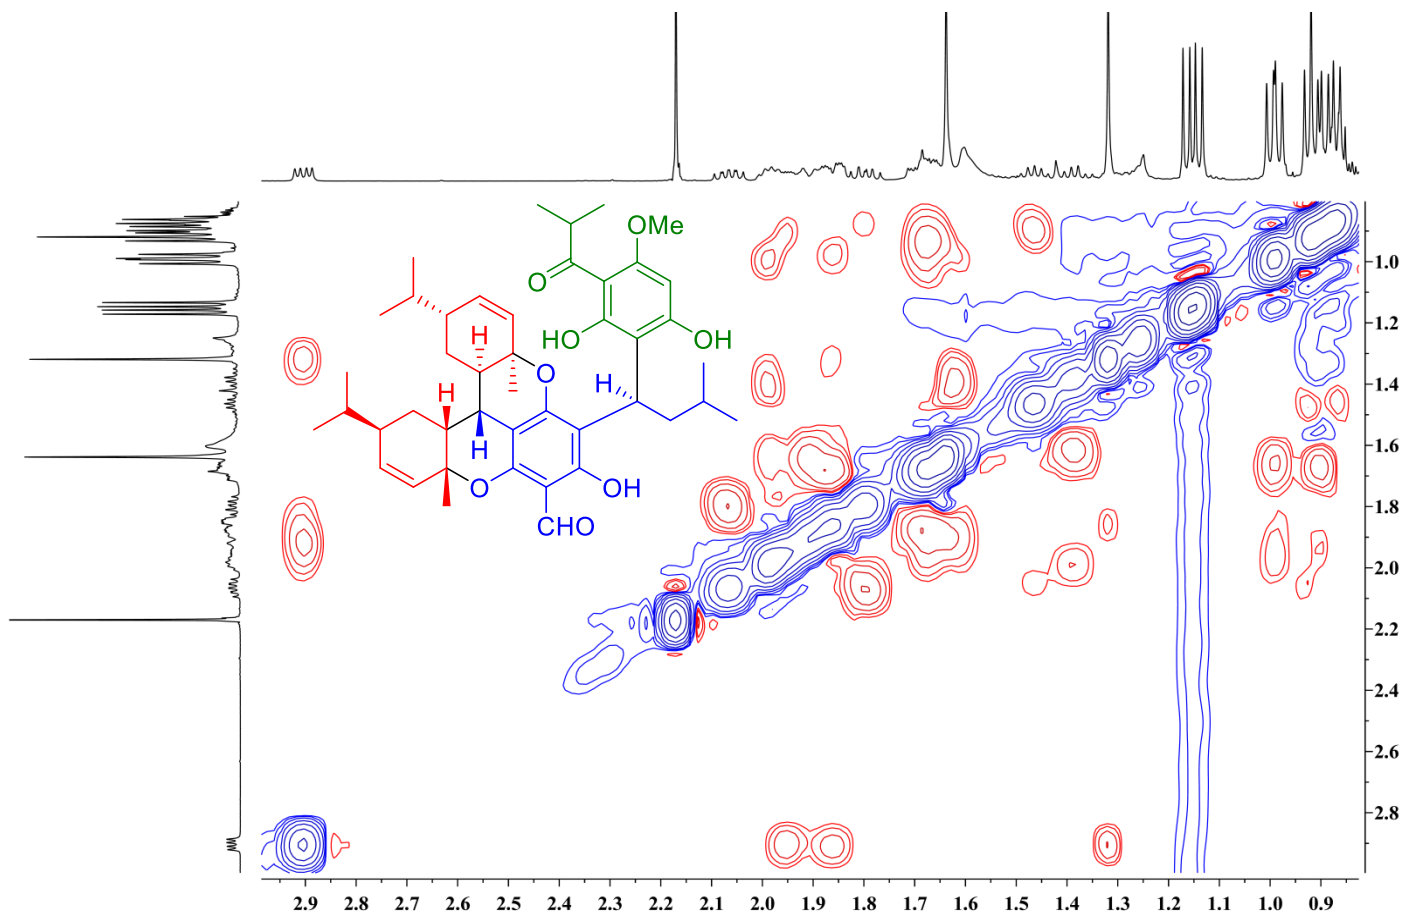

Figure S8 ROESY Spectrum of Eucalyptusdimer A (1)

User Spectra

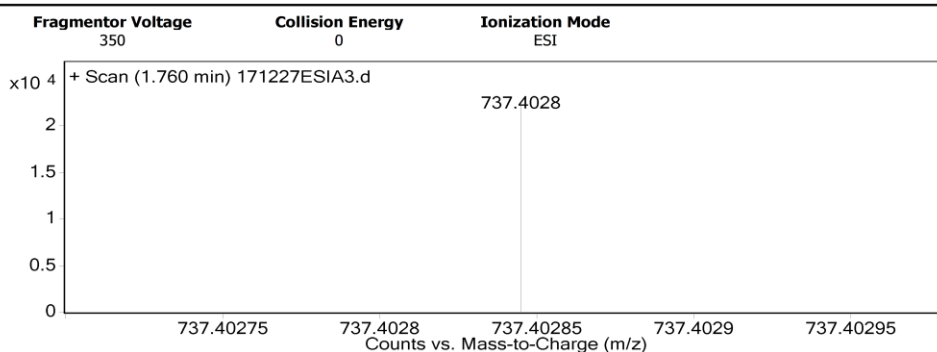

Peak List

| <i>m/z</i> | <i>z</i> | Abund    | Formula       | Ion |
|------------|----------|----------|---------------|-----|
| 391.1896   | 1        | 10453.85 |               |     |
| 437.1953   | 1        | 27722.77 |               |     |
| 438.1987   | 1        | 6109.48  |               |     |
| 527.3138   | 1        | 8758.85  |               |     |
| 619.5266   | 1        | 6440.91  |               |     |
| 647.5589   | 1        | 5551.11  |               |     |
| 737.4028   | 1        | 22277.34 | C44 H58 Na O8 | M+  |
| 738.4055   | 1        | 9167.02  | C44 H58 Na O8 | M+  |
| 922.0098   | 1        | 60144.13 |               |     |
| 923.0121   | 1        | 8105.51  |               |     |

Formula Calculator Element Limits

| Element | Min | Max |
|---------|-----|-----|
| C       | 0   | 200 |
| H       | 0   | 400 |
| O       | 4   | 10  |
| Na      | 1   | 1   |

Formula Calculator Results

| Formula       | CalculatedMass | Mz       | Diff.(mDa) | Diff. (ppm) | DBE  |
|---------------|----------------|----------|------------|-------------|------|
| C44 H58 Na O8 | 737.4029       | 737.4028 | 0.1        | 0.2         | 15.5 |

Figure S9 ROESY Spectrum of Eucalyptusdimer A (1)

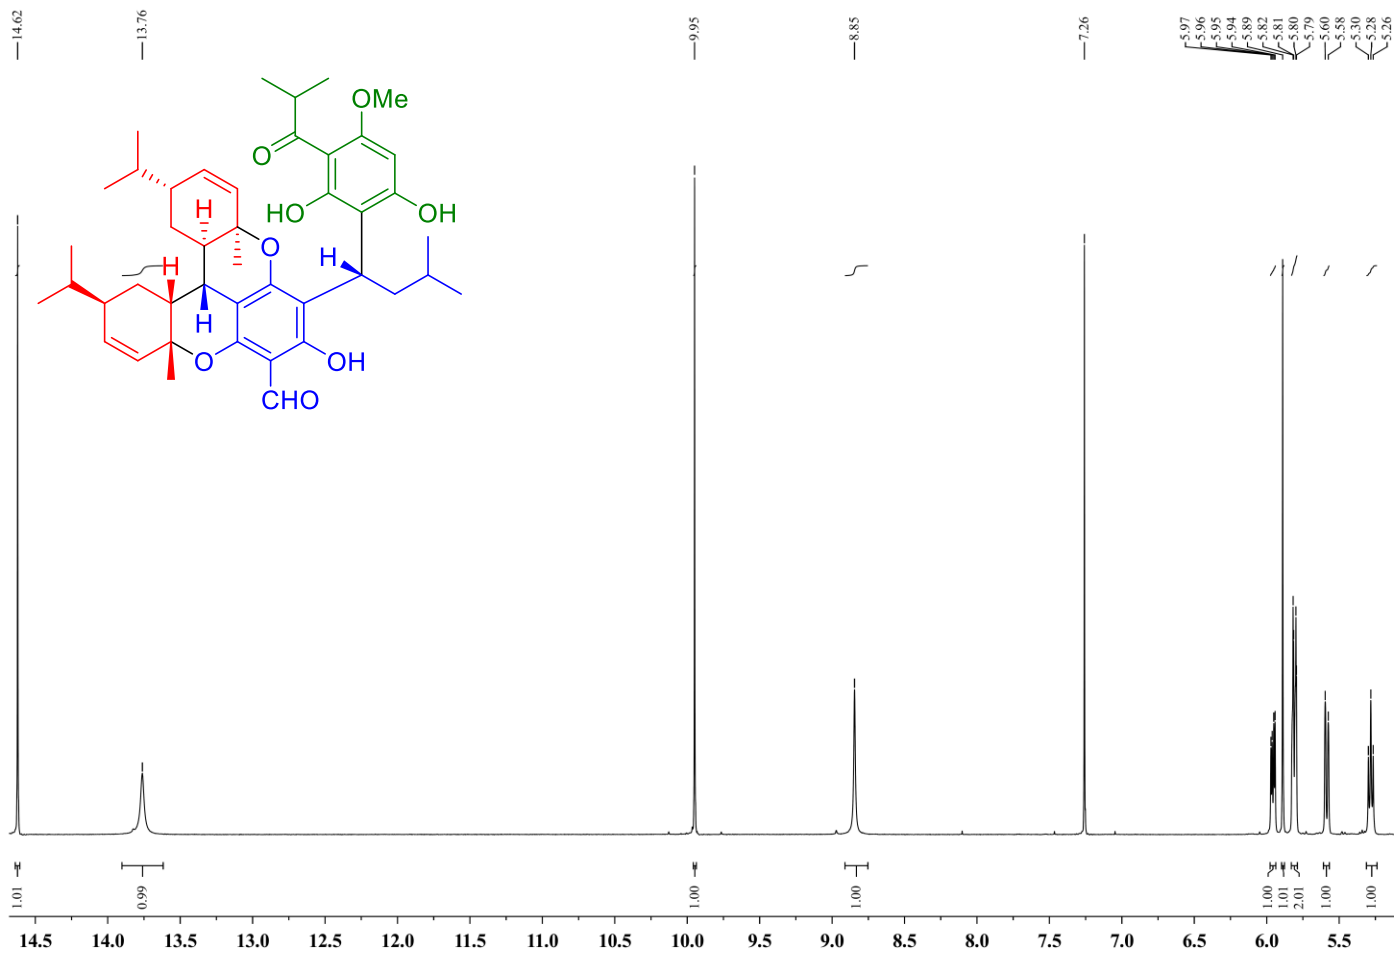

**Figure S11**  $^1\text{H}$  NMR Spectrum of Eucalyptusdimer B (2)

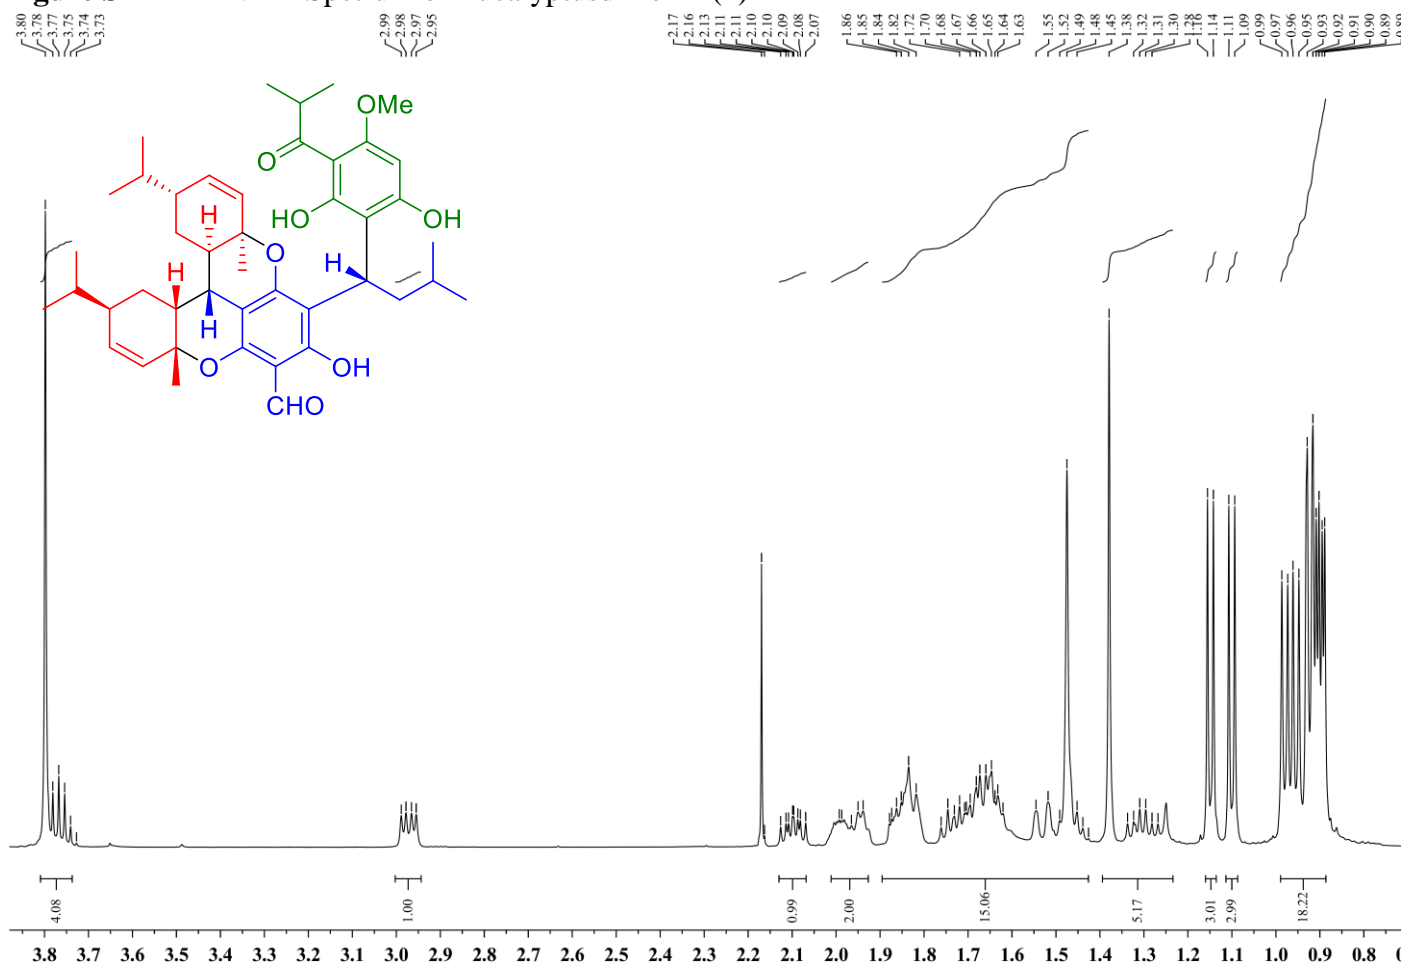

**Figure S12**  $^1\text{H}$  NMR Spectrum of Eucalyptusdimer B (2)

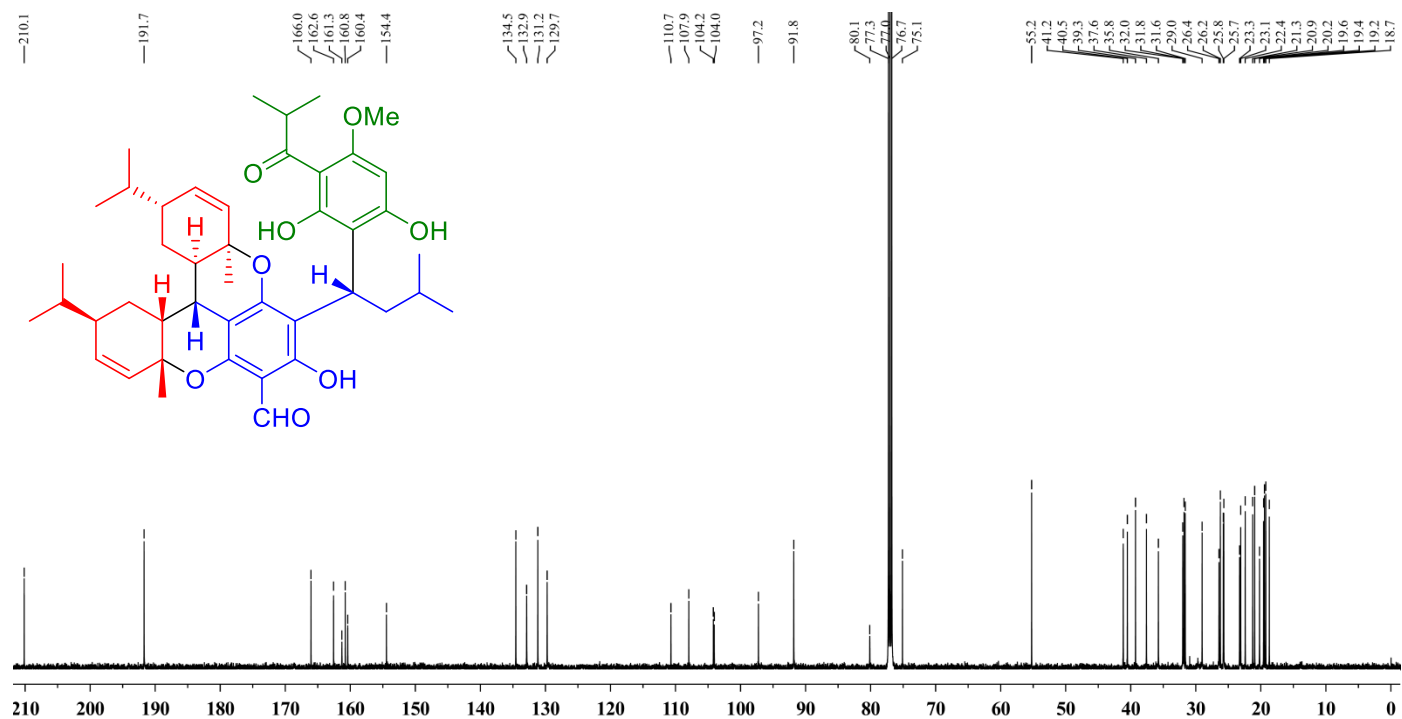

**Figure S13** <sup>13</sup>C NMR Spectrum of Eucalyptusdimer B (2)

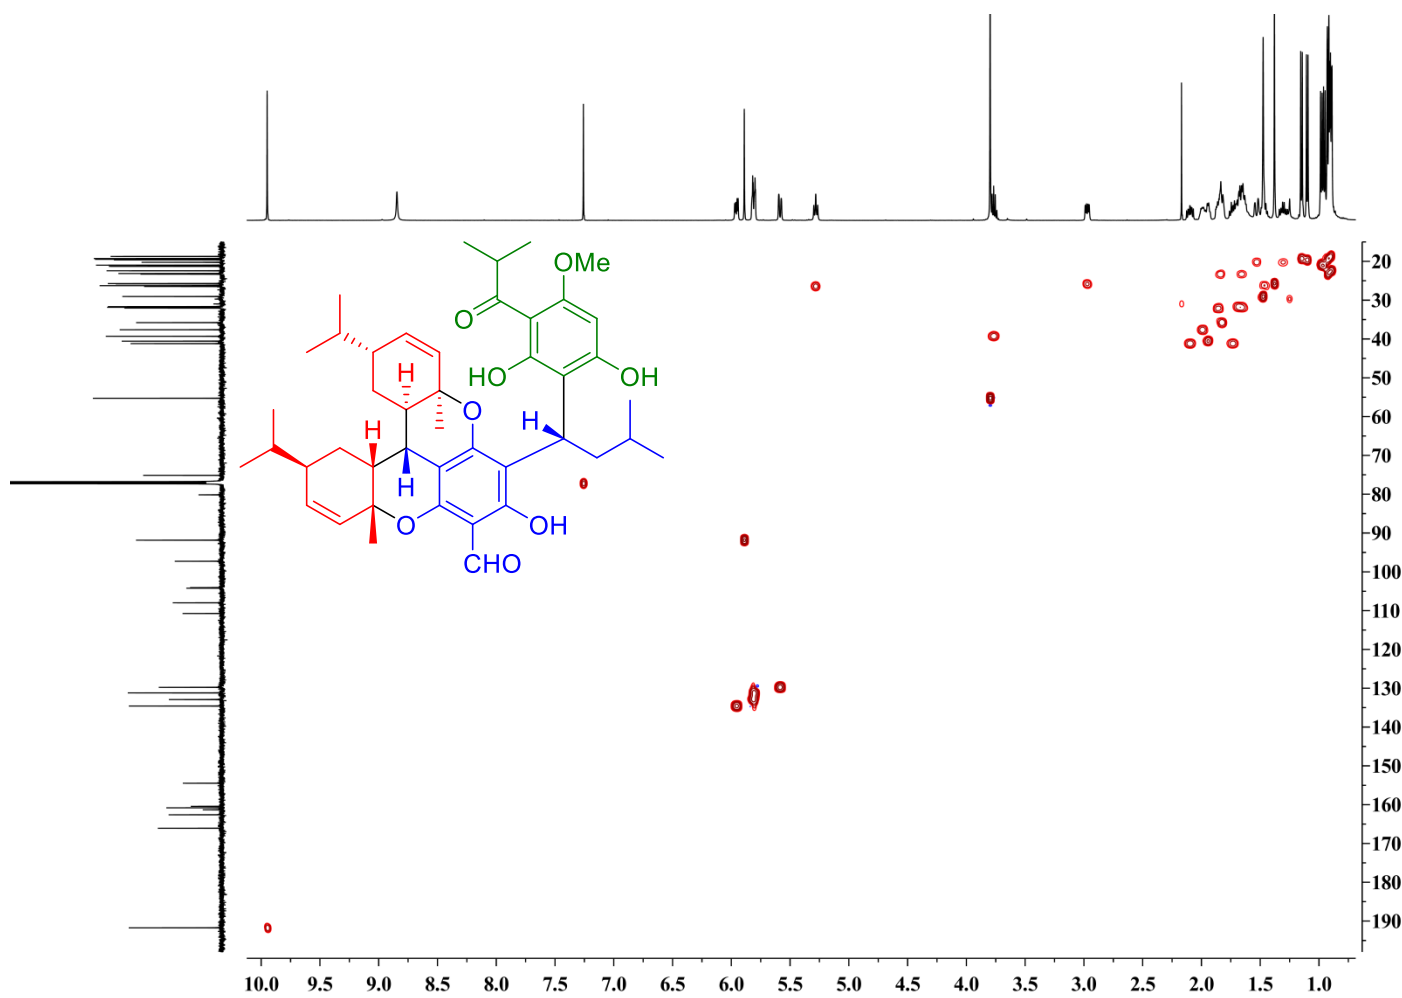

**Figure S14** HSQC Spectrum of Eucalyptusdimer B (2)

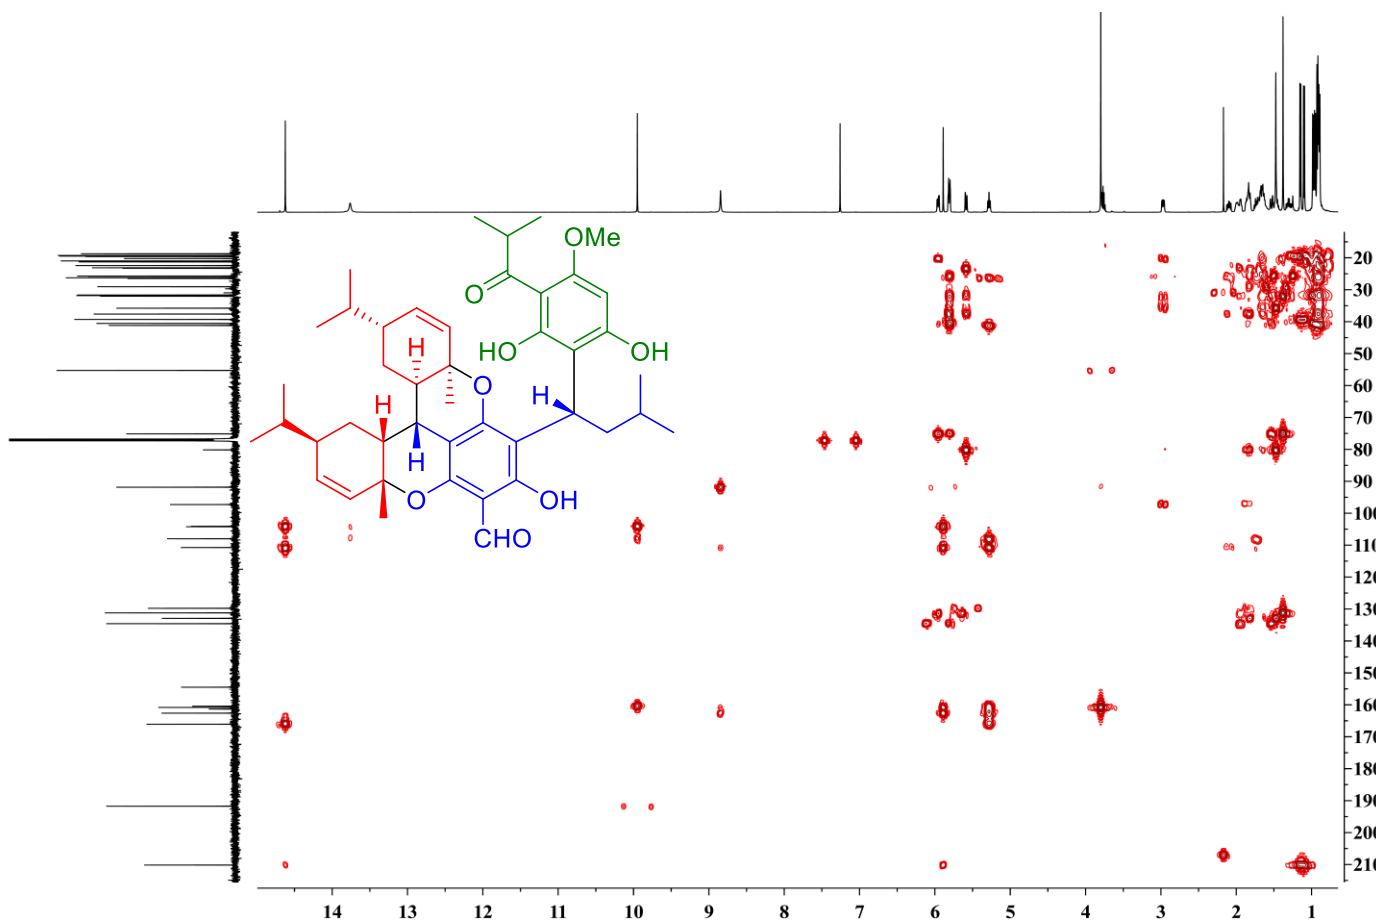

Figure S15 HMBC Spectrum of Eucalyptusdimer B (2)

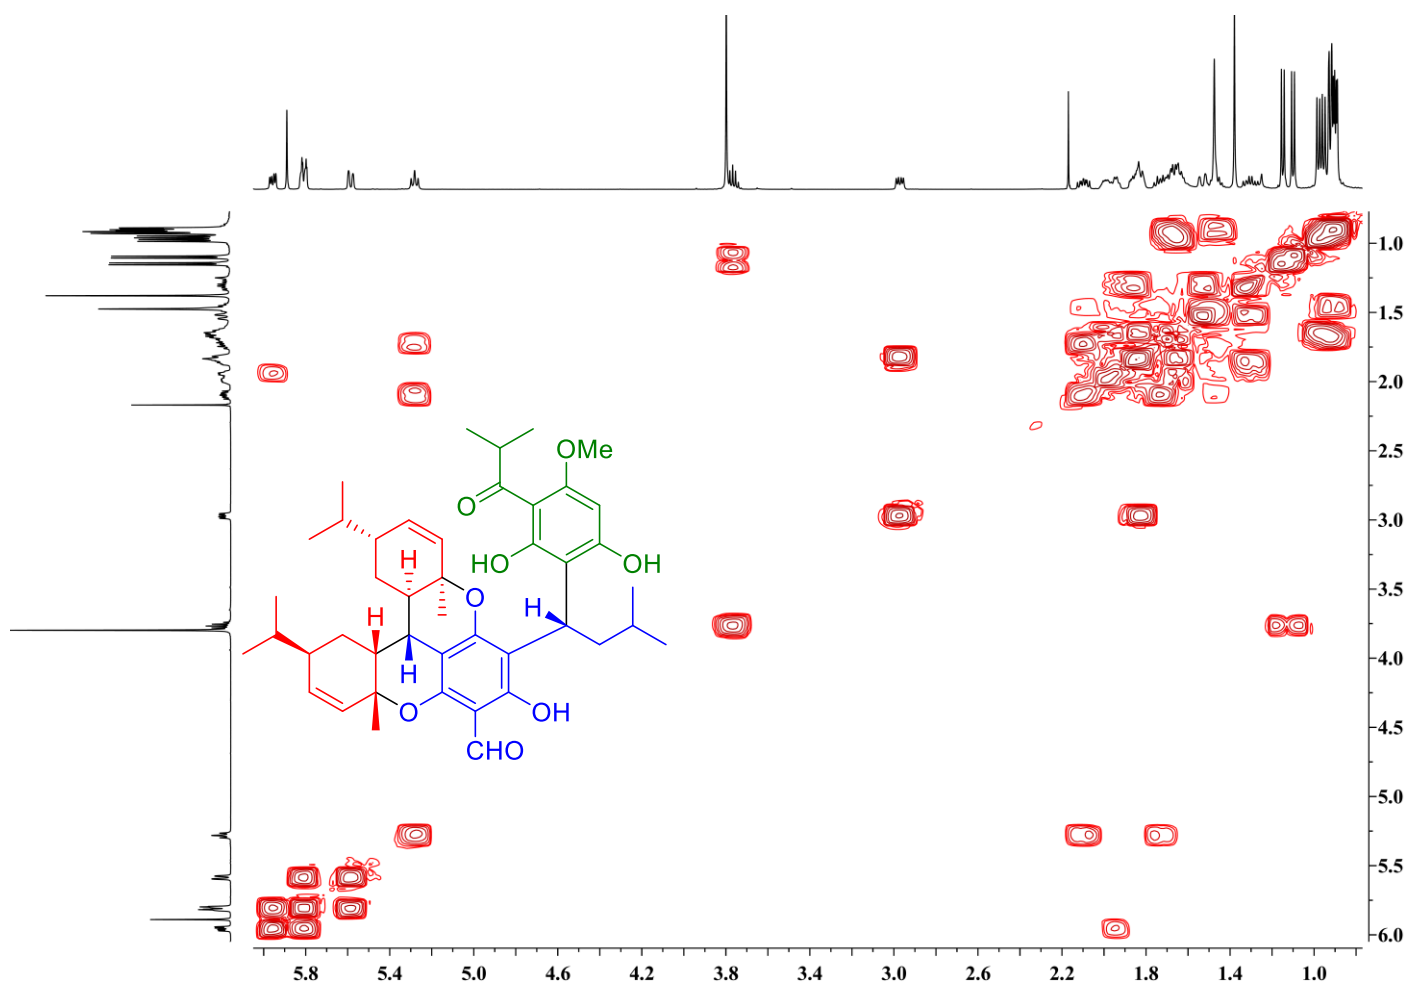

Figure S16  $^1\text{H}$ - $^1\text{H}$  COSY Spectrum of Eucalyptusdimer B (2)

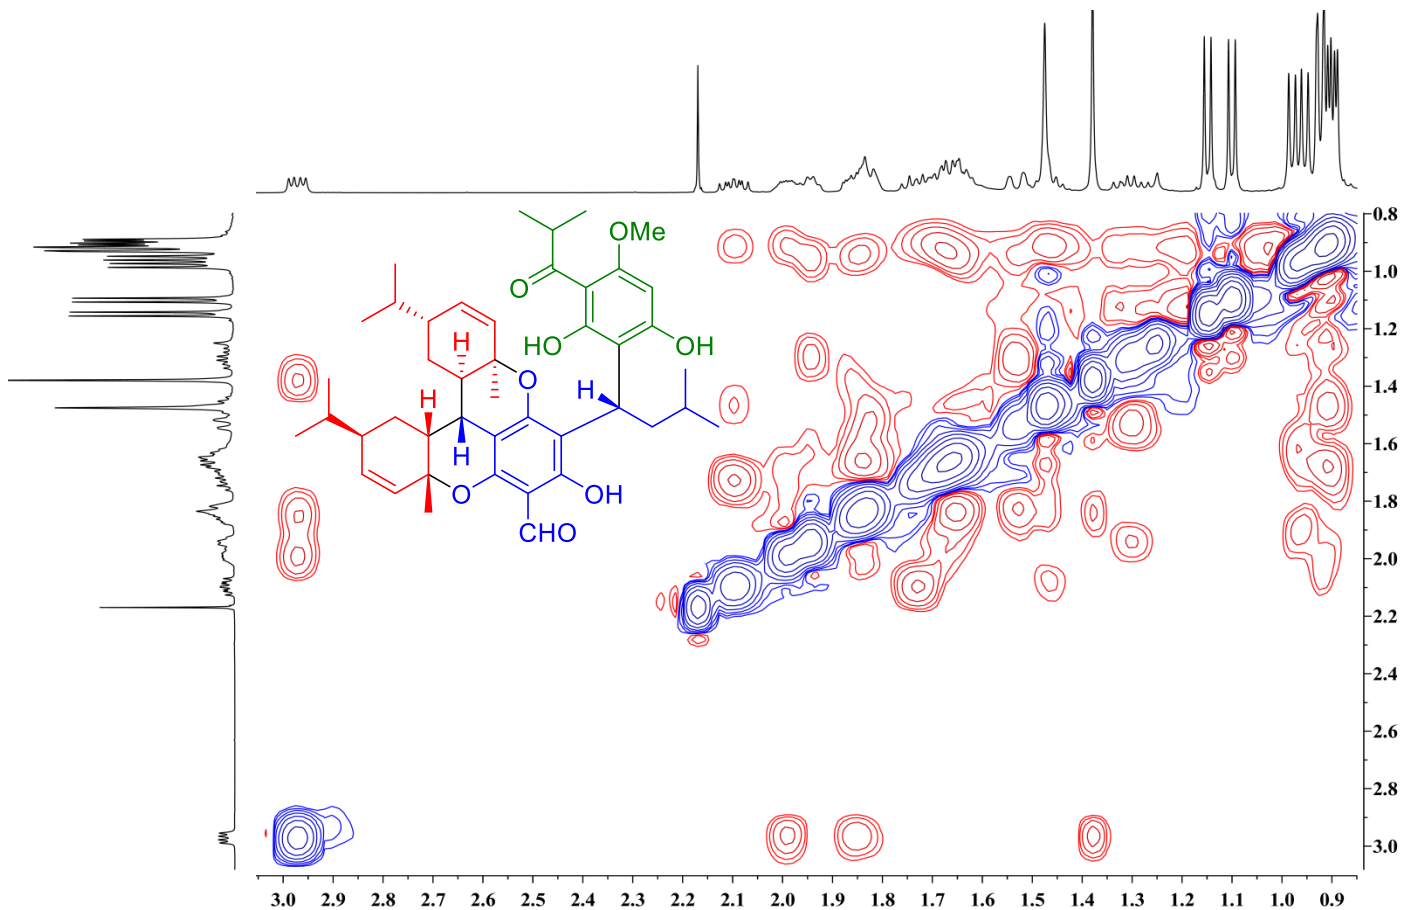

Figure S17 ROESY Spectrum of Eucalyptusdimer B (2)

User Spectra

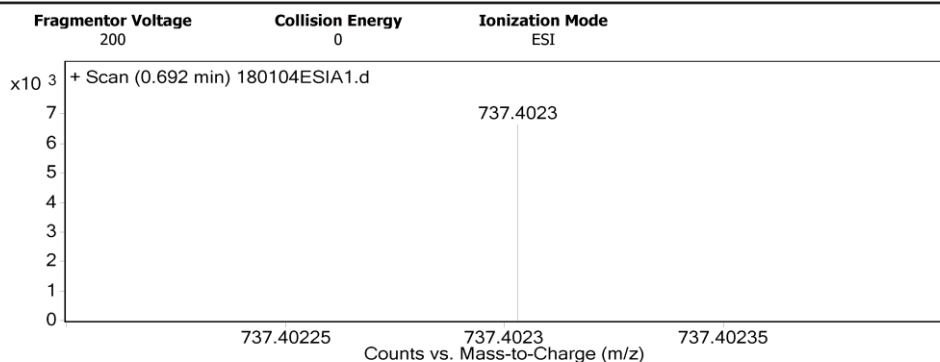

Peak List

| <i>m/z</i> | <i>z</i> | Abund    | Formula                                          | Ion            |
|------------|----------|----------|--------------------------------------------------|----------------|
| 102.1278   |          | 5423.62  |                                                  |                |
| 121.0509   |          | 5352.75  |                                                  |                |
| 341.2666   | 1        | 6515.15  |                                                  |                |
| 385.2925   | 1        | 22730.14 |                                                  |                |
| 429.3189   | 1        | 27147.9  |                                                  |                |
| 430.3224   | 1        | 5150.71  |                                                  |                |
| 473.3454   | 1        | 12832.58 |                                                  |                |
| 517.3708   | 1        | 5177.51  |                                                  |                |
| 737.4023   | 1        | 6633.85  | C <sub>44</sub> H <sub>58</sub> NaO <sub>8</sub> | M <sup>+</sup> |
| 1452.8161  | 1        | 4019.75  |                                                  |                |

Formula Calculator Element Limits

| Element | Min | Max |
|---------|-----|-----|
| C       | 0   | 200 |
| H       | 0   | 400 |
| O       | 4   | 10  |
| Na      | 1   | 1   |

Formula Calculator Results

| Formula                                          | CalculatedMass | Mz       | Diff.(mDa) | Diff. (ppm) | DBE  |
|--------------------------------------------------|----------------|----------|------------|-------------|------|
| C <sub>44</sub> H <sub>58</sub> NaO <sub>8</sub> | 737.4029       | 737.4023 | 0.6        | 0.9         | 15.5 |

Figure S18 HRESIMS Spetrum of Eucalyptusdimer B (2)

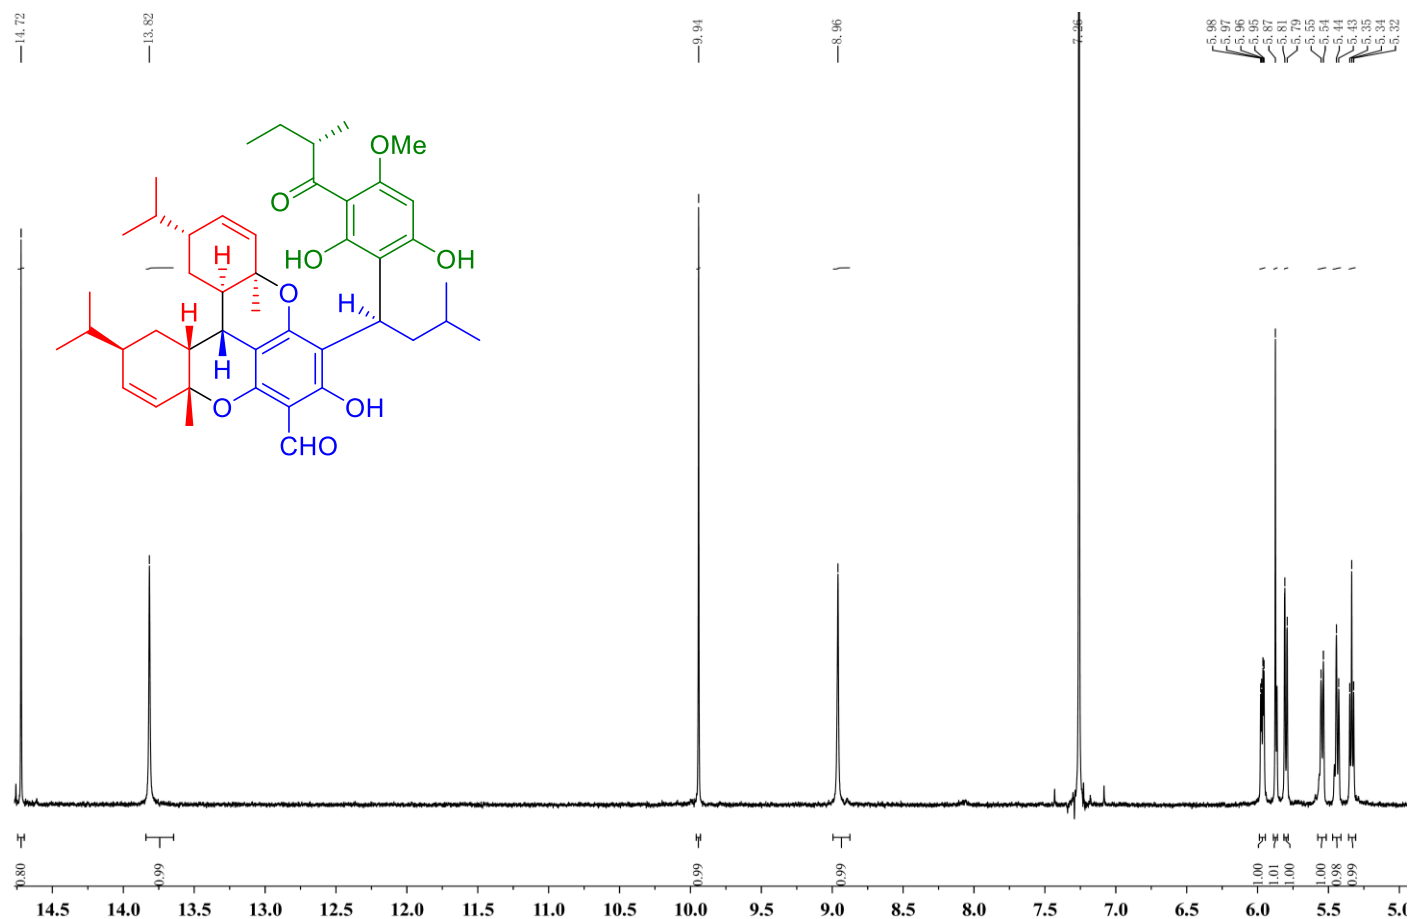

**Figure S20.**  $^1\text{H}$  NMR Spectrum of Eucalyptusdimer C (3) in  $\text{CDCl}_3$

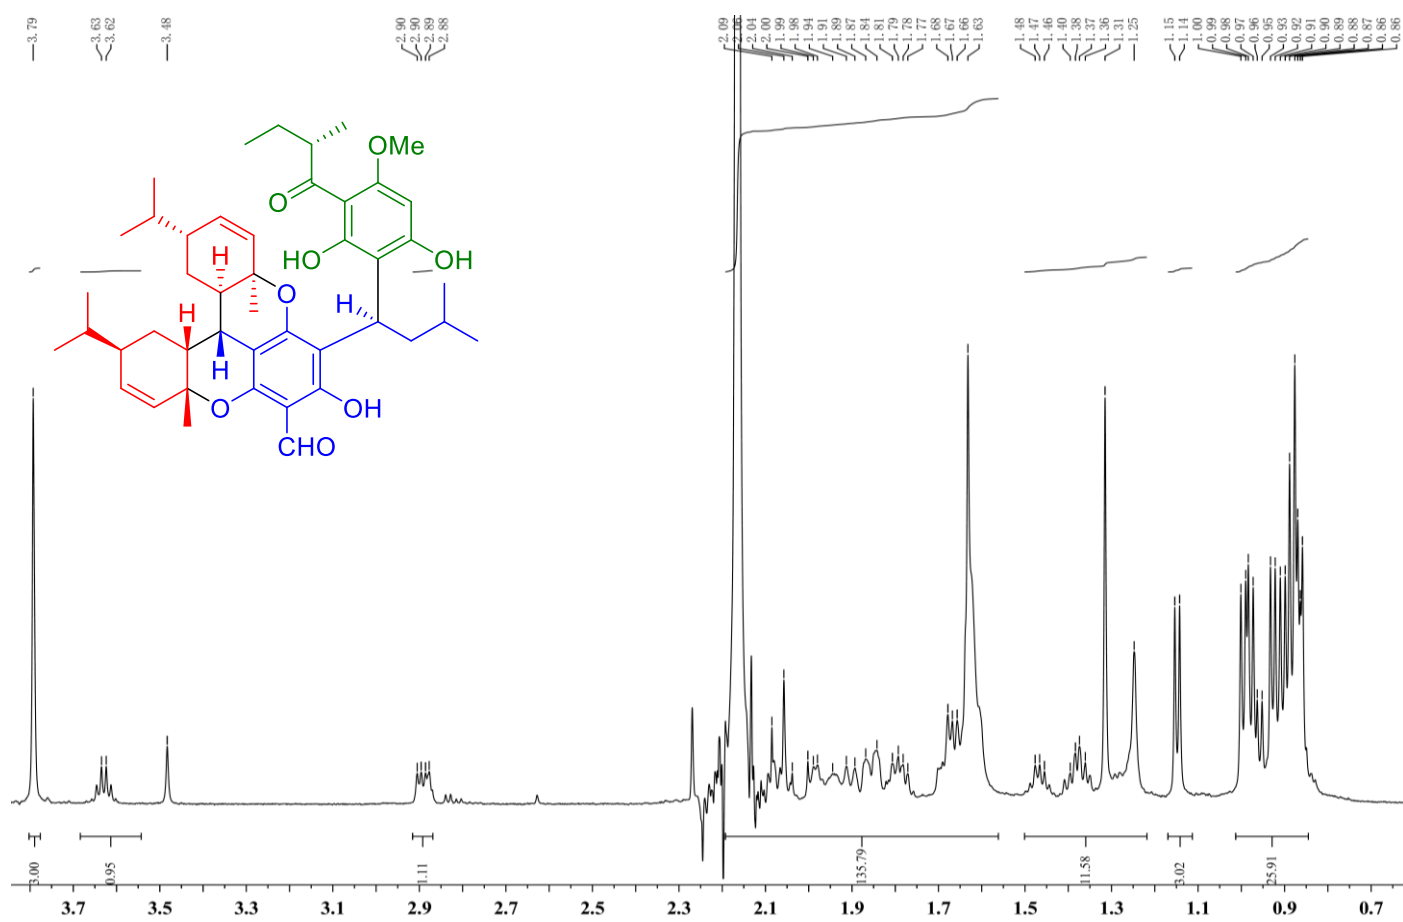

**Figure S21.**  $^1\text{H}$  NMR Spectrum of Eucalyptusdimer C (3) in  $\text{CDCl}_3$



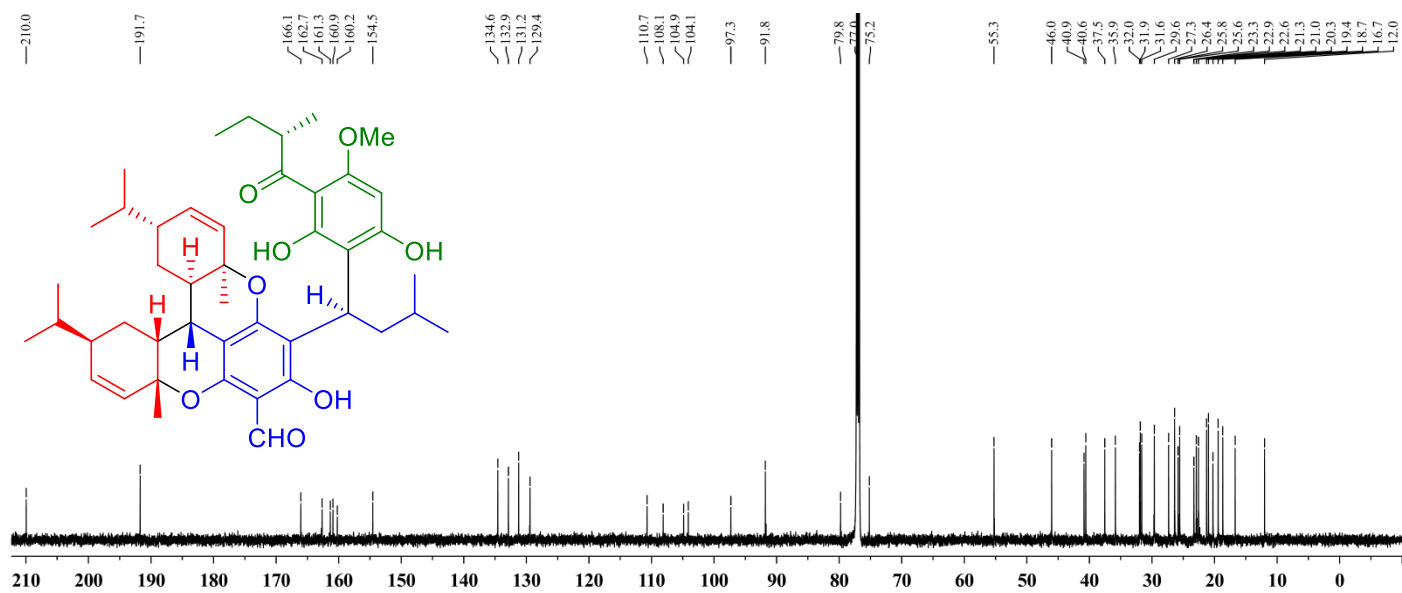

Figure S22.  $^{13}\text{C}$  NMR Spectrum of Eucalyptusdimer B (**2**) in  $\text{CDCl}_3$

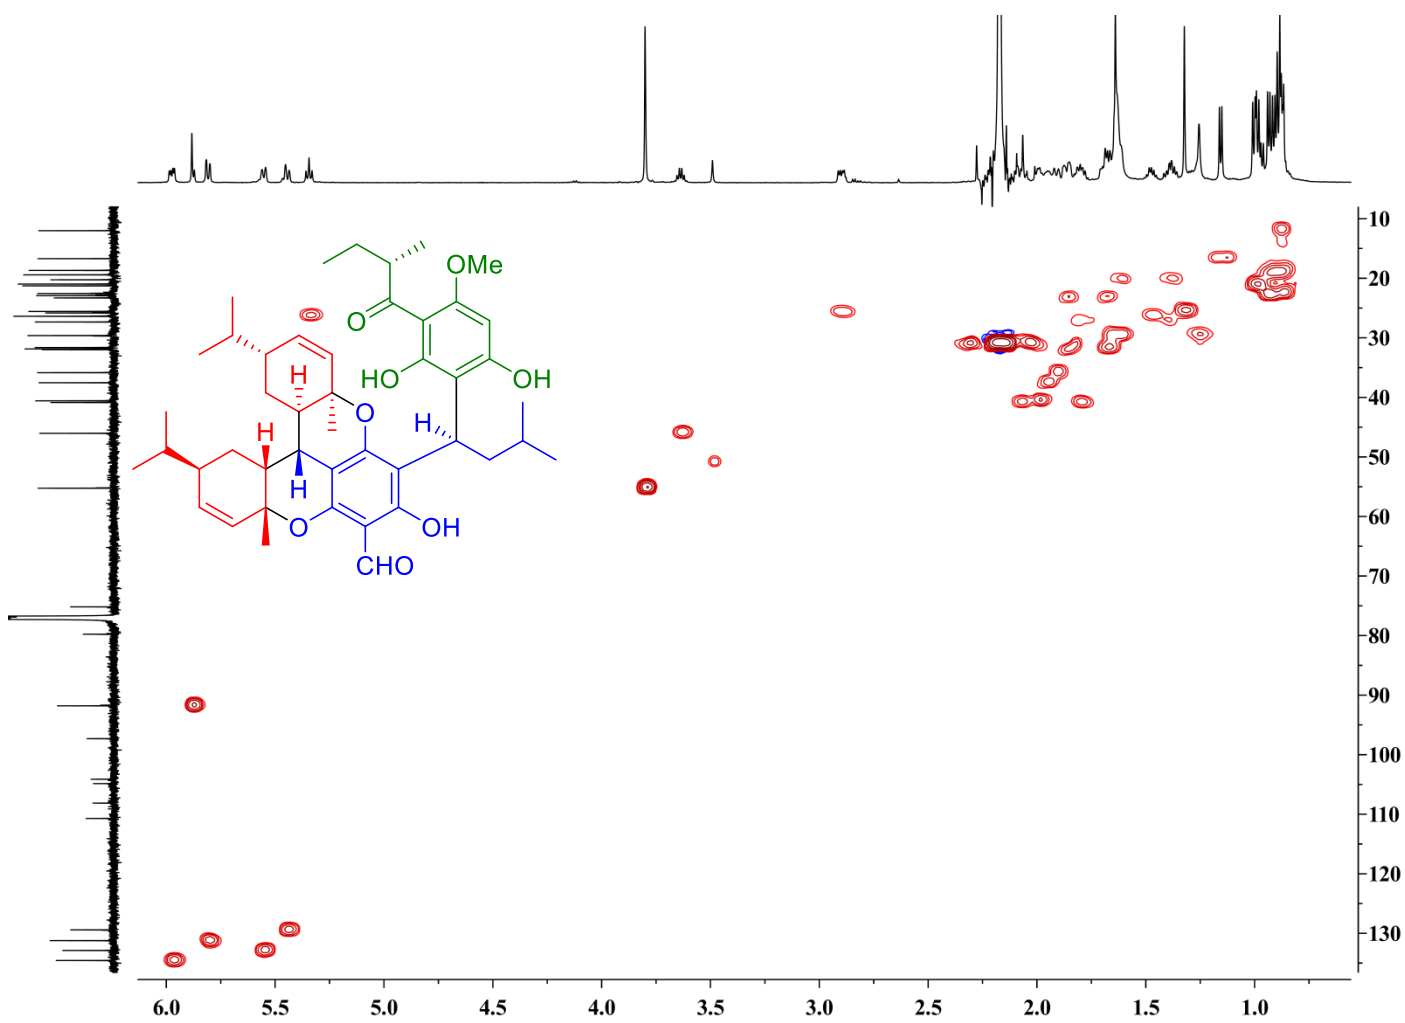

Figure S23. HSQC Spectrum of Eucalyptusdimer C (**3**)

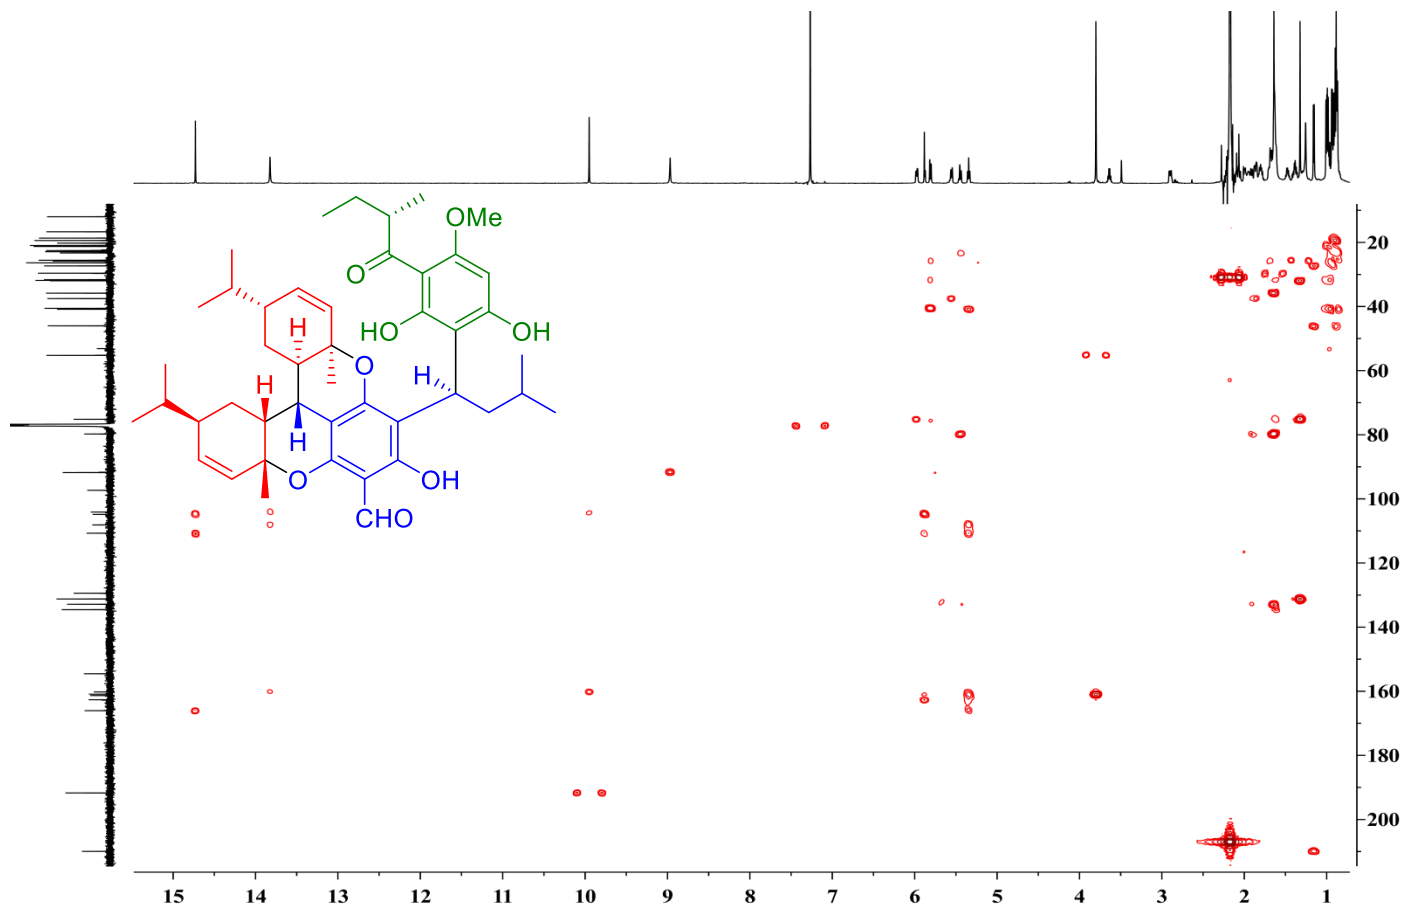

Figure S24. HMBC Spectrum of Eucalyptusdimer C (3)

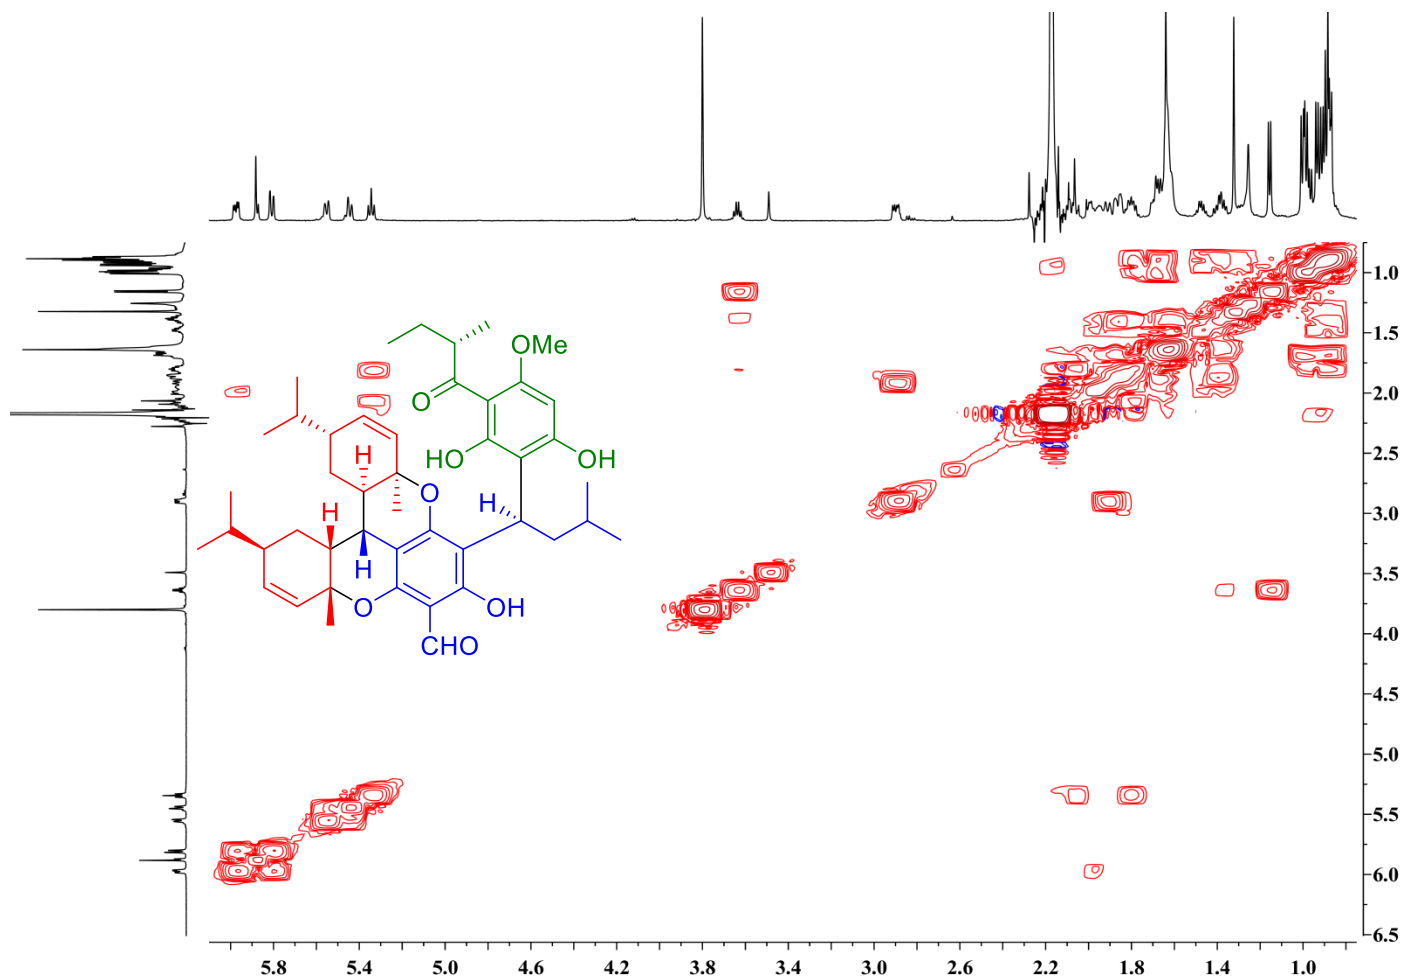

Figure S25.  $^1\text{H}$ - $^1\text{H}$  COSY Spectrum of Eucalyptusdimer B (2)

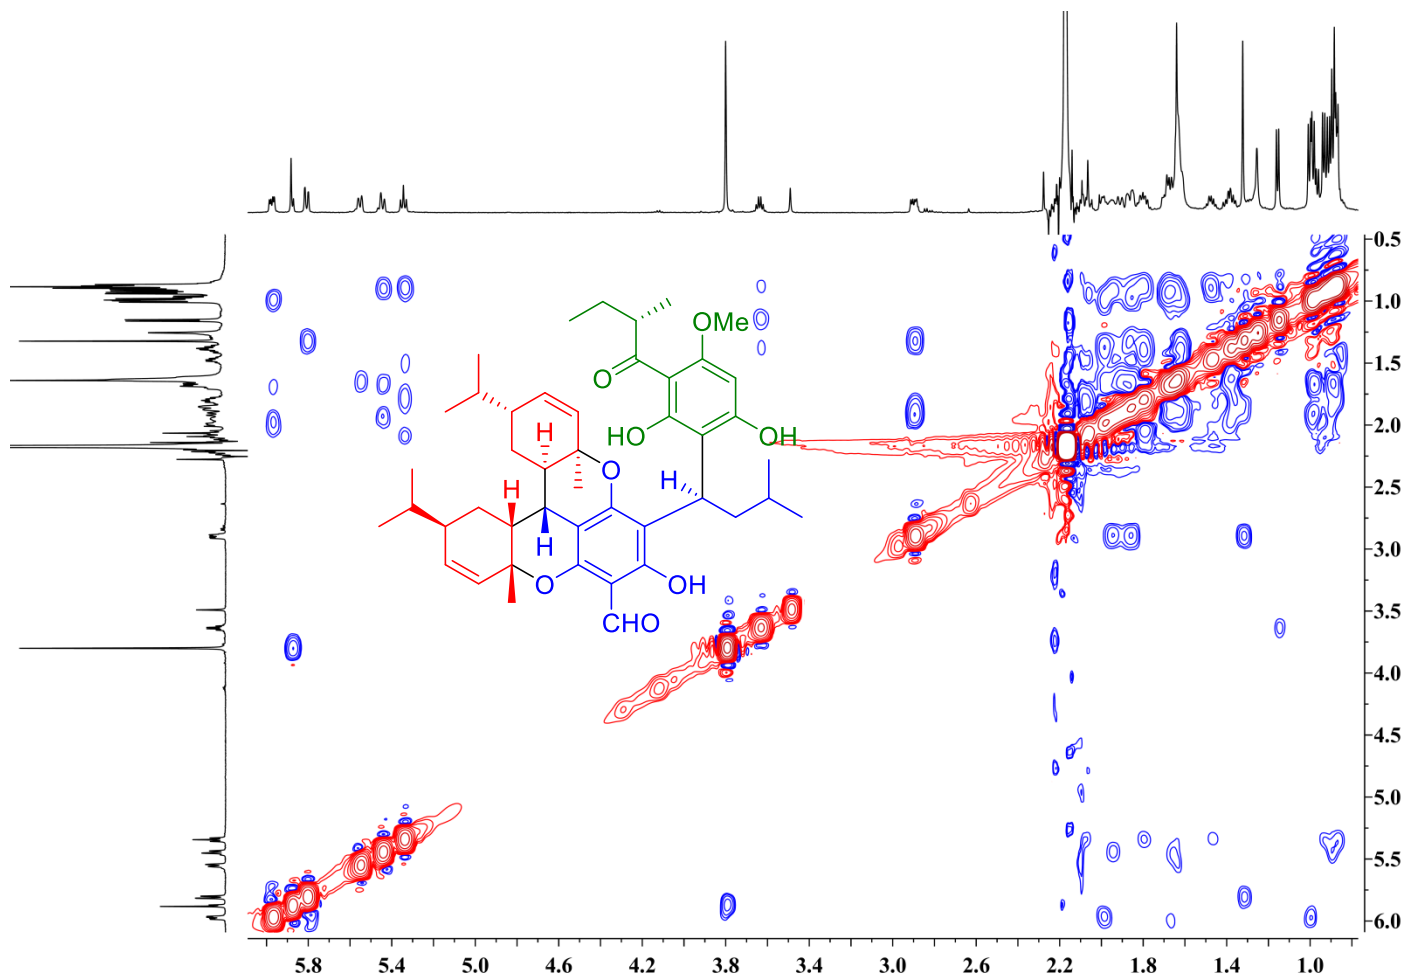

Figure S26. ROESY Spectrum of Eucalyptusdimer C (3)

### User Spectra

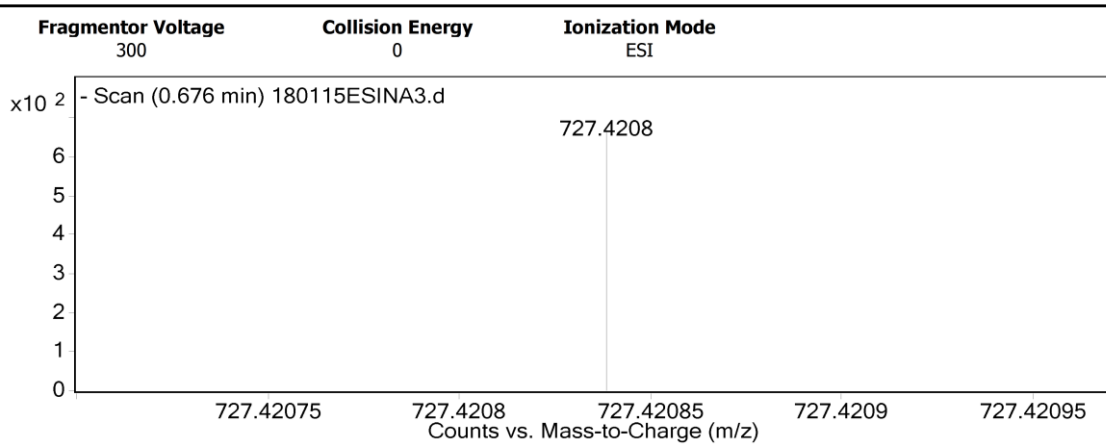

### Peak List

| m/z      | Abund   | Formula                                        | Ion            |
|----------|---------|------------------------------------------------|----------------|
| 112.9856 | 5847.54 |                                                |                |
| 183.0118 | 221.24  |                                                |                |
| 727.4208 | 667.38  | C <sub>45</sub> H <sub>59</sub> O <sub>8</sub> | M <sup>-</sup> |

### Formula Calculator Element Limits

| Element | Min | Max |
|---------|-----|-----|
| C       | 0   | 200 |
| H       | 0   | 400 |
| O       | 4   | 10  |

### Formula Calculator Results

| Formula                                        | CalculatedMass | Mz       | Diff.(mDa) | Diff. (ppm) | DBE  |
|------------------------------------------------|----------------|----------|------------|-------------|------|
| C <sub>45</sub> H <sub>59</sub> O <sub>8</sub> | 727.4210       | 727.4208 | 0.2        | 0.3         | 16.5 |

Figure S27. HRESIMS Spectrum of Eucalyptusdimer C (3)

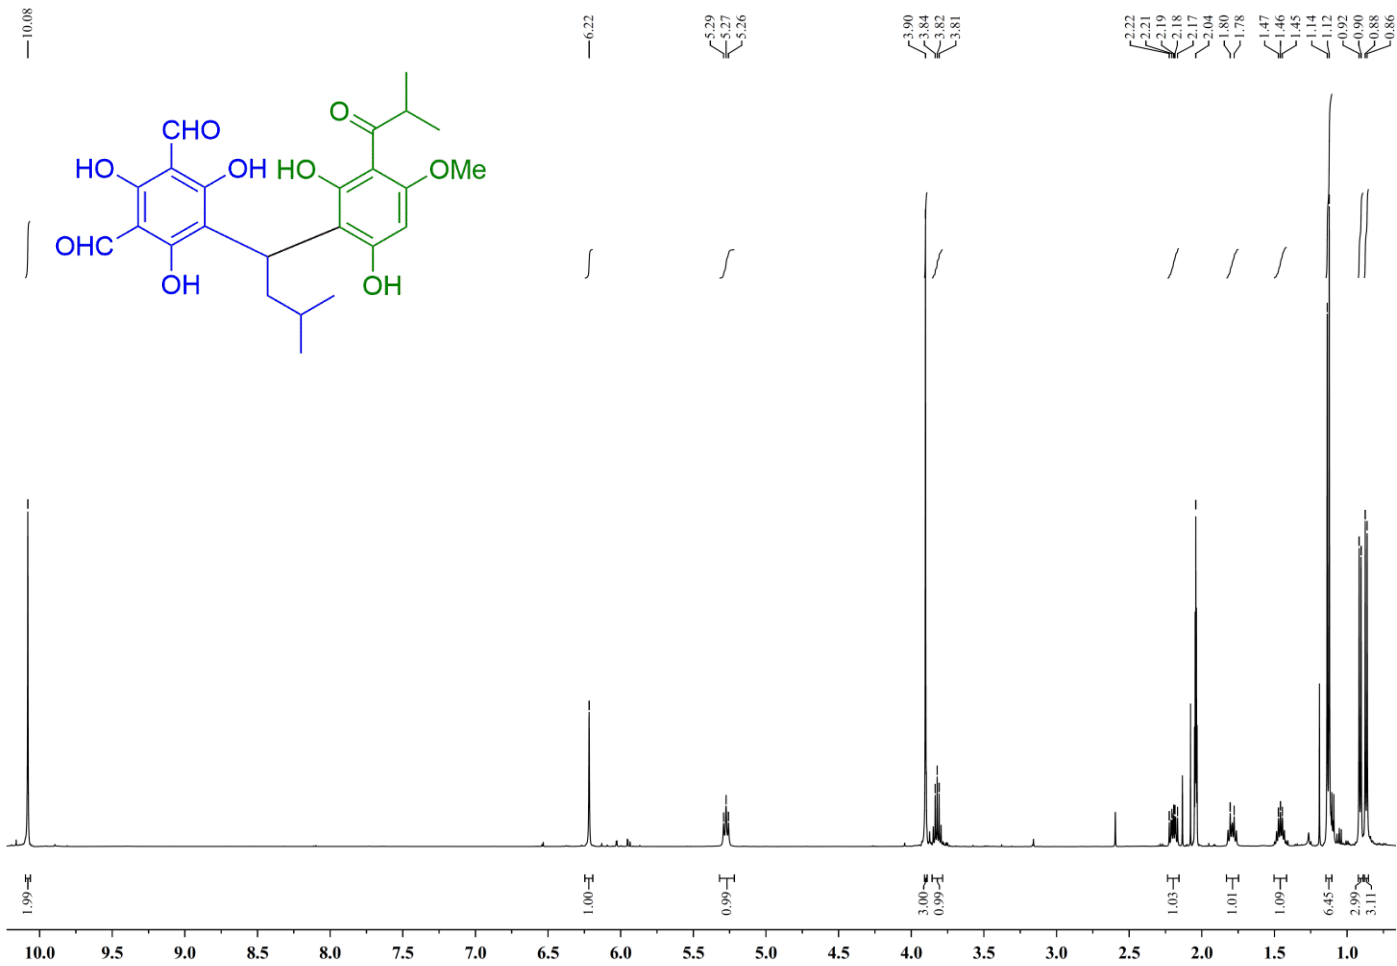

**Figure S25.**  $^1\text{H}$  NMR Spectrum of Eucalyprobusone A (**4**) in Acetone- $d_6$

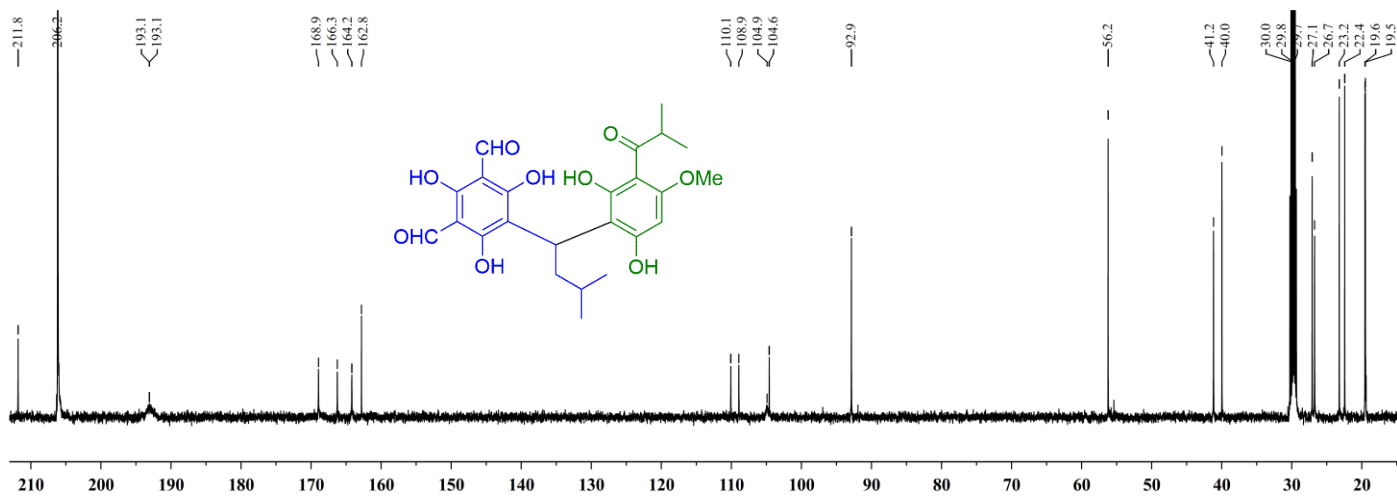

**Figure S26.**  $^{13}\text{C}$  NMR Spectrum of Eucalyprobusone A (**4**) in Acetone- $d_6$

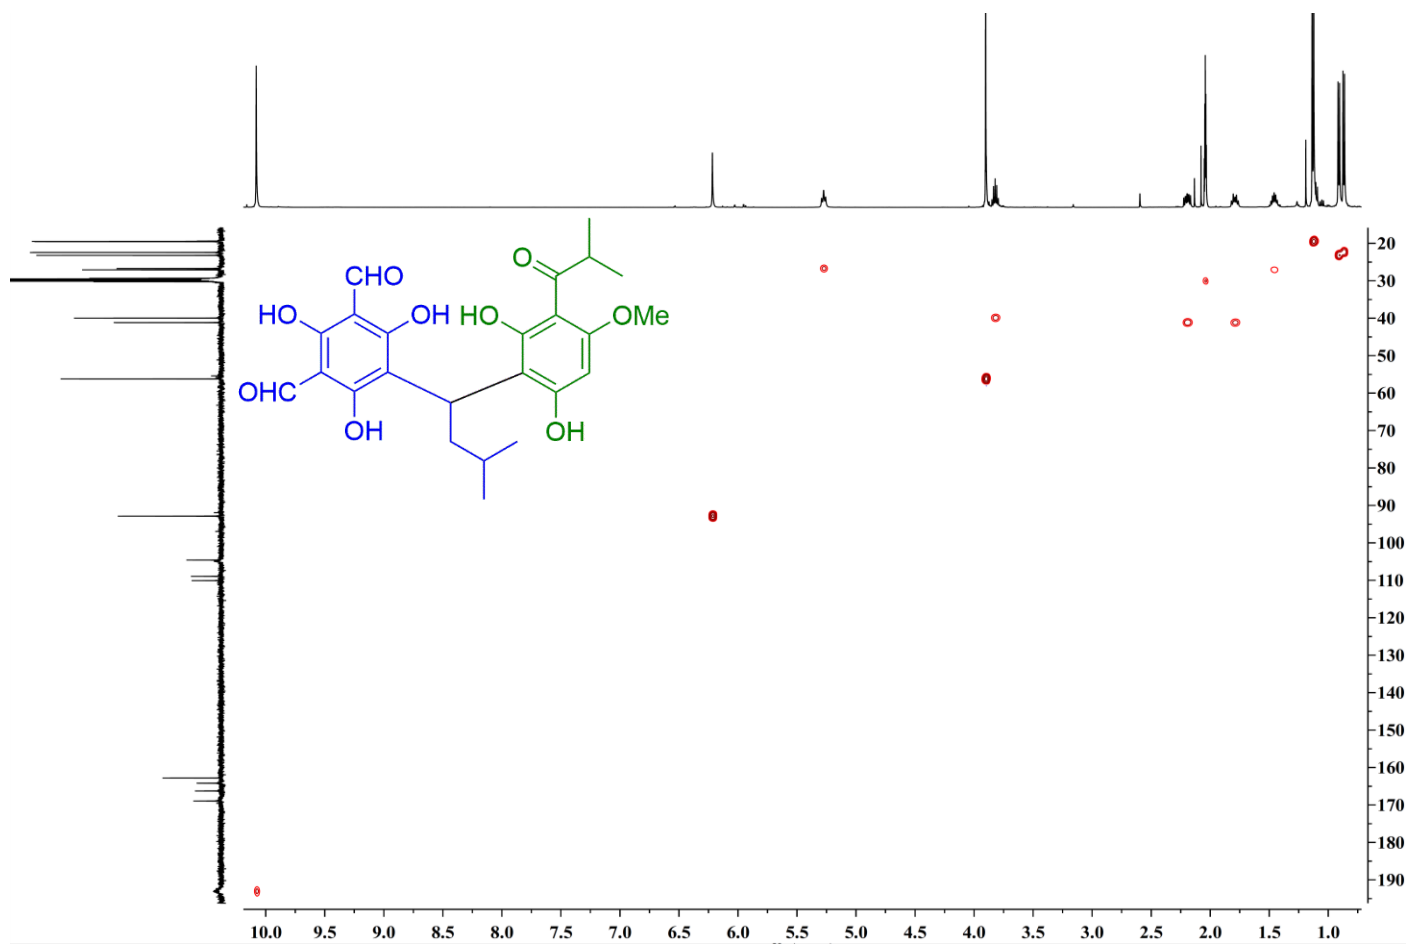

Figure S27. HSQC Spectrum of Eucalyprobusone A (4)

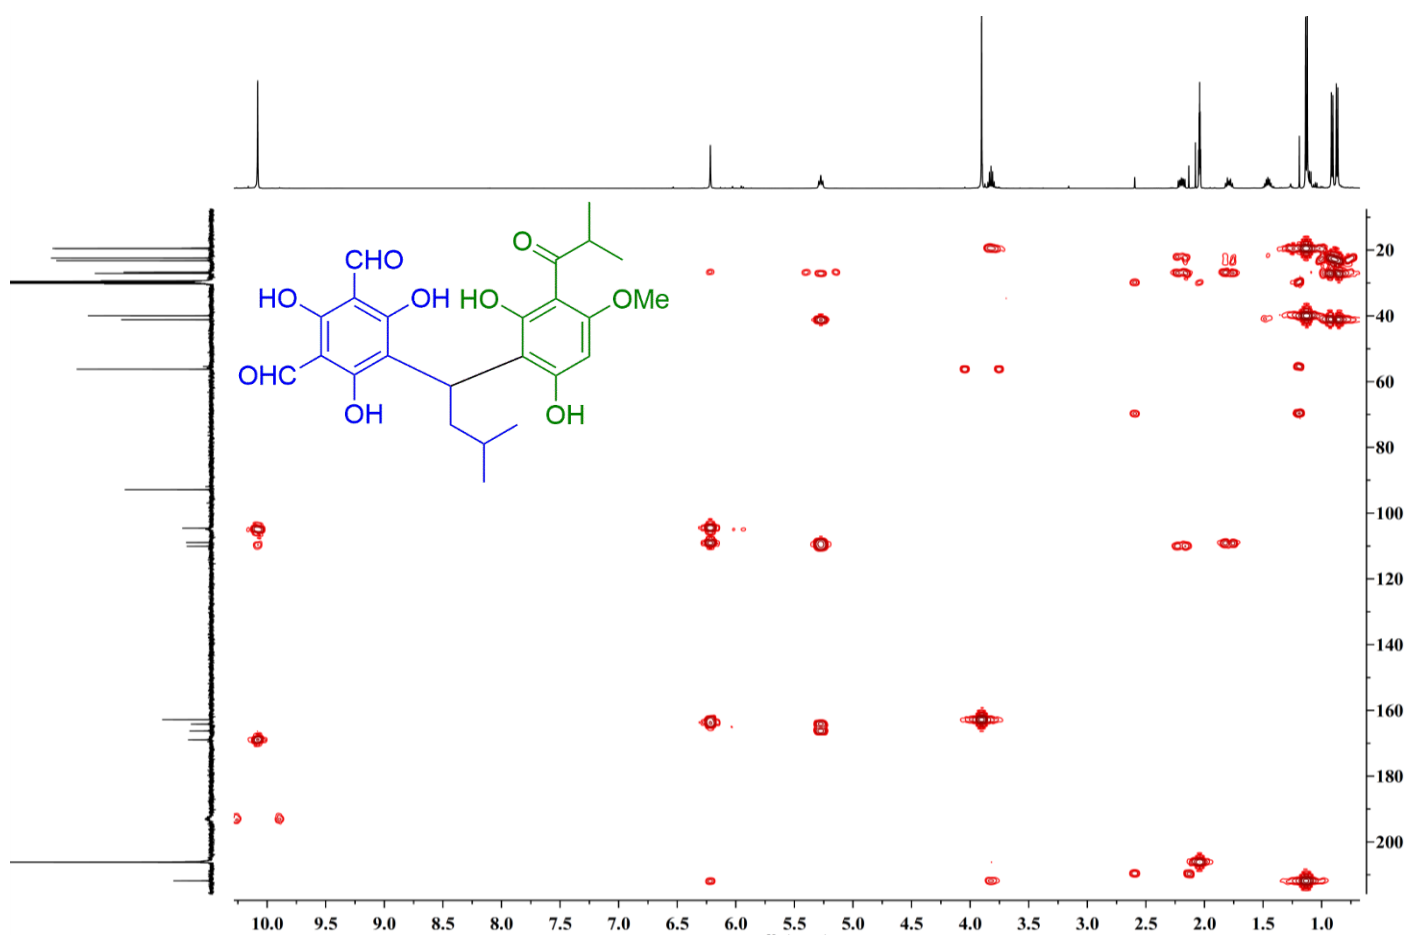

Figure S28. HMBC Spectrum of Eucalyprobusone A (4)

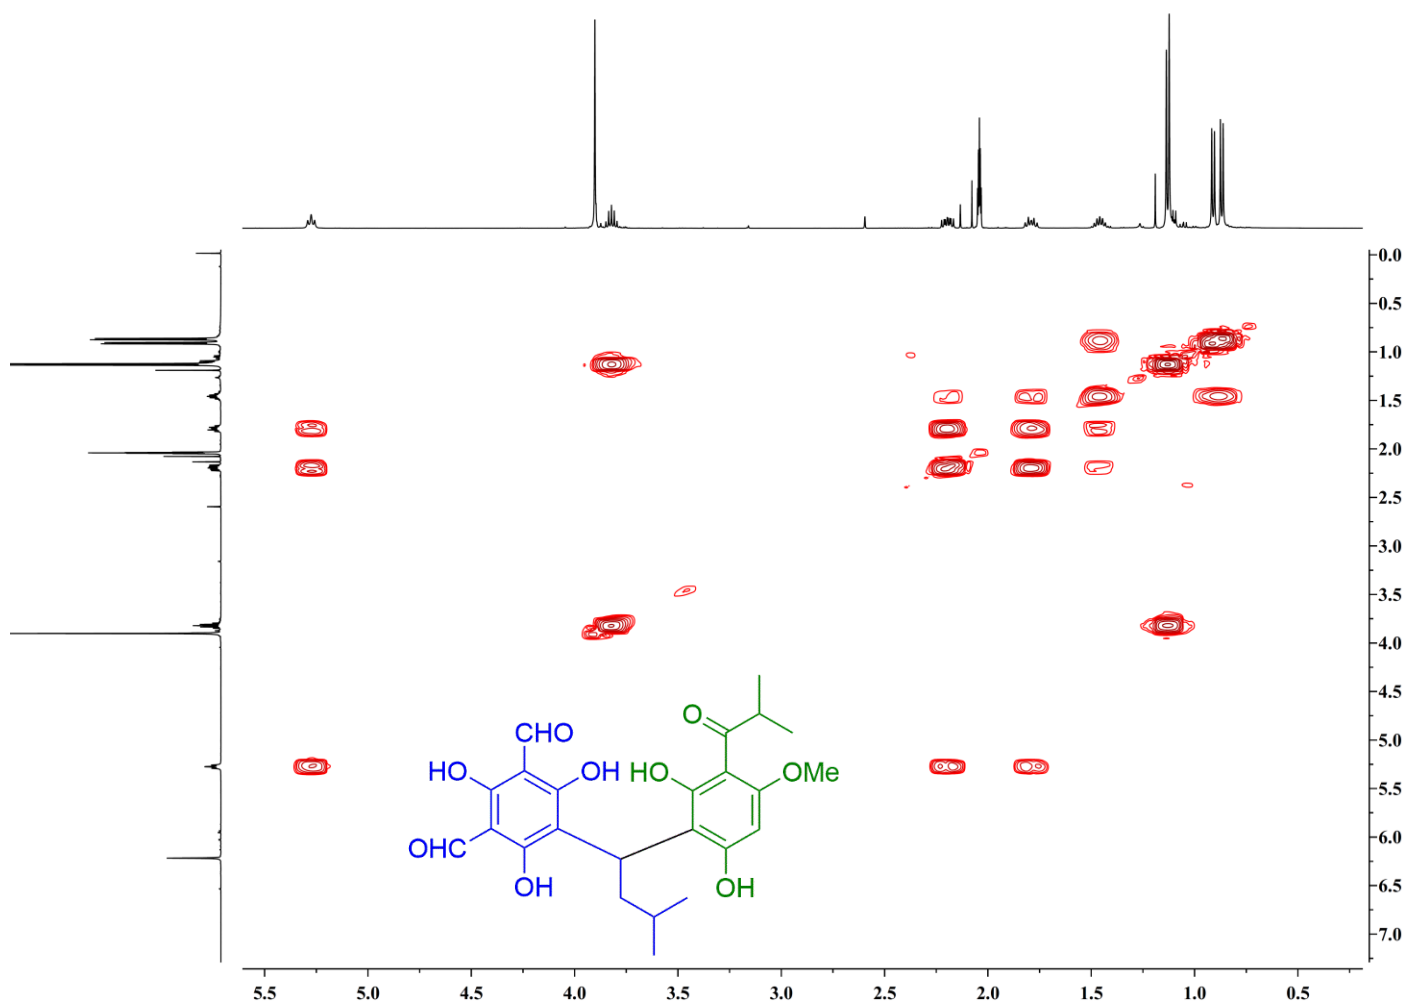

**Figure S29.**  $^1\text{H}$ - $^1\text{H}$  COSY Spectrum of Eucalyprobosone A (**4**)

**User Spectra**

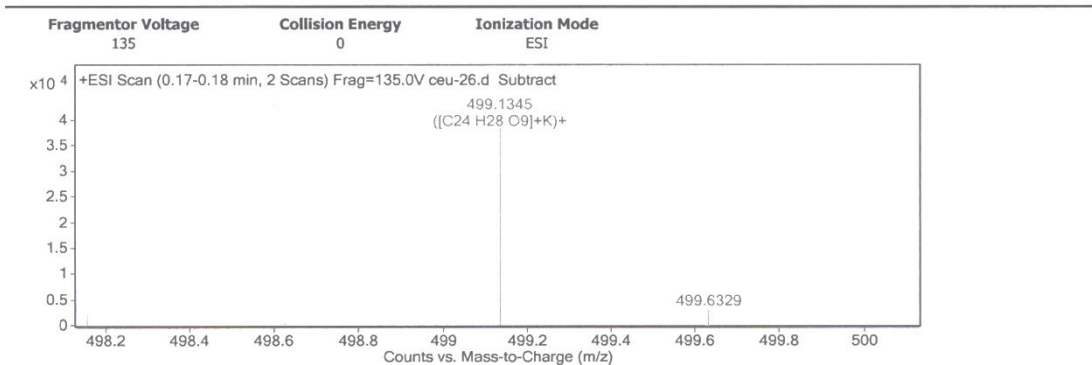

**Peak List**

| <i>m/z</i> | <i>z</i> | Abund    | Formula                                        | Ion                |
|------------|----------|----------|------------------------------------------------|--------------------|
| 299.1114   | 1        | 56808.45 |                                                |                    |
| 301.1416   | 1        | 35021.72 |                                                |                    |
| 315.0855   | 1        | 90959.04 |                                                |                    |
| 317.1157   | 1        | 68790.2  |                                                |                    |
| 499.1345   | 1        | 38546.86 | C <sub>24</sub> H <sub>28</sub> O <sub>9</sub> | (M+K) <sup>+</sup> |
| 540.1553   | 1        | 19467.76 |                                                |                    |
| 575.233    | 1        | 21283.24 |                                                |                    |
| 658.433    | 1        | 26975.96 |                                                |                    |

**Formula Calculator Element Limits**

| Element | Min | Max |
|---------|-----|-----|
| C       | 3   | 60  |
| H       | 0   | 120 |
| O       | 0   | 10  |

**Formula Calculator Results**

| Formula                                        | CalculatedMass | CalculatedMz | Mz       | Diff. (mDa) | Diff. (ppm) | DBE     |
|------------------------------------------------|----------------|--------------|----------|-------------|-------------|---------|
| C <sub>24</sub> H <sub>28</sub> O <sub>9</sub> | 460.1733       | 499.1365     | 499.1345 | 2.00        | 4.01        | 11.0000 |

**Figure S30.** HRESIMS Spectrum of Eucalyprobosone A (**4**)

Computational data for **1**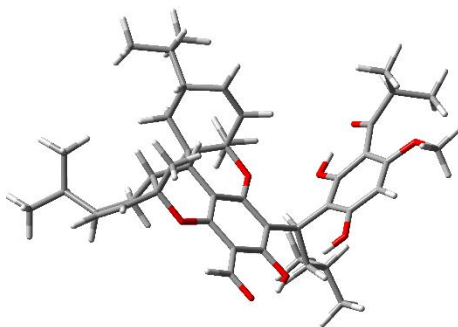Optimized structure of **1****Standard orientation:**

| Center Number | Atomic Number | Atomic Type | Coordinates (Angstroms) |           |           |
|---------------|---------------|-------------|-------------------------|-----------|-----------|
|               |               |             | X                       | Y         | Z         |
| 1             | 6             | 0           | 2.682560                | 3.437189  | -0.249510 |
| 2             | 6             | 0           | 3.220130                | 2.531260  | 0.884089  |
| 3             | 6             | 0           | 2.432497                | 1.209672  | 1.018974  |
| 4             | 6             | 0           | 0.966864                | 1.556601  | 1.321041  |
| 5             | 6             | 0           | 0.412827                | 2.521001  | 0.306158  |
| 6             | 6             | 0           | 1.171773                | 3.366312  | -0.358377 |
| 7             | 6             | 0           | 2.515973                | 0.354465  | -0.266528 |
| 8             | 6             | 0           | 1.520059                | -0.786760 | -0.244500 |
| 9             | 6             | 0           | 0.343167                | -0.692720 | 0.486593  |
| 10            | 8             | 0           | 0.139135                | 0.355346  | 1.310585  |
| 11            | 1             | 0           | 2.812427                | 0.641333  | 1.857259  |
| 12            | 6             | 0           | 1.741885                | -1.922604 | -0.983629 |
| 13            | 6             | 0           | 0.800144                | -2.948702 | -1.006289 |
| 14            | 6             | 0           | -0.398982               | -2.791945 | -0.292150 |
| 15            | 6             | 0           | -0.663620               | -1.666854 | 0.455571  |
| 16            | 6             | 0           | 3.151911                | 4.915292  | -0.128627 |
| 17            | 6             | 0           | 4.687117                | 5.030131  | -0.201396 |
| 18            | 6             | 0           | 2.619780                | 5.619429  | 1.133960  |
| 19            | 8             | 0           | 2.880268                | -2.121365 | -1.695625 |
| 20            | 6             | 0           | 3.878503                | -1.053090 | -1.852487 |
| 21            | 6             | 0           | 3.933793                | -0.185852 | -0.580917 |
| 22            | 6             | 0           | 4.538900                | -1.001310 | 0.578428  |
| 23            | 6             | 0           | 5.950579                | -1.571441 | 0.286370  |
| 24            | 6             | 0           | 6.089786                | -1.982051 | -1.158500 |
| 25            | 6             | 0           | 5.180142                | -1.778707 | -2.086975 |
| 26            | 1             | 0           | 2.233491                | 1.006546  | -1.080851 |
| 27            | 6             | 0           | 3.493513                | -0.259239 | -3.105234 |
| 28            | 1             | 0           | 4.577663                | 0.648168  | -0.816717 |
| 29            | 6             | 0           | 7.114606                | -0.656435 | 0.770006  |
| 30            | 6             | 0           | 8.466851                | -1.398368 | 0.703263  |
| 31            | 6             | 0           | 7.217476                | 0.677551  | 0.008233  |
| 32            | 8             | 0           | -1.317438               | -3.801910 | -0.352507 |
| 33            | 6             | 0           | -1.946805               | -1.416290 | 1.258104  |
| 34            | 6             | 0           | -3.139125               | -0.975402 | 0.400414  |
| 35            | 6             | 0           | -3.978603               | -1.834668 | -0.290143 |
| 36            | 6             | 0           | -5.096121               | -1.351427 | -0.964193 |
| 37            | 6             | 0           | -5.382634               | -0.018359 | -1.008823 |
| 38            | 6             | 0           | -4.553072               | 0.913046  | -0.357489 |
| 39            | 6             | 0           | -3.466977               | 0.382076  | 0.385512  |
| 40            | 6             | 0           | -2.254940               | -2.556534 | 2.266117  |
| 41            | 6             | 0           | -3.449091               | -2.253207 | 3.196352  |
| 42            | 6             | 0           | -3.220631               | -0.978845 | 4.032953  |
| 43            | 8             | 0           | -3.830484               | -3.174632 | -0.330490 |
| 44            | 8             | 0           | -2.699976               | 1.196868  | 1.149631  |
| 45            | 1             | 0           | -1.711161               | -0.552595 | 1.847508  |
| 46            | 6             | 0           | -3.686362               | -3.457510 | 4.129133  |
| 47            | 6             | 0           | -4.719834               | 2.378975  | -0.372607 |

|     |   |   |            |            |            |
|-----|---|---|------------|------------|------------|
| 48  | 6 | 0 | -5. 515736 | 3. 202188  | -1. 388608 |
| 49  | 8 | 0 | -4. 111004 | 3. 066249  | 0. 464536  |
| 50  | 6 | 0 | -5. 260585 | 2. 826579  | -2. 858327 |
| 51  | 6 | 0 | -7. 012500 | 3. 283454  | -1. 014718 |
| 52  | 6 | 0 | 0. 734994  | 2. 083483  | 2. 741670  |
| 53  | 6 | 0 | 1. 055973  | -4. 151723 | -1. 758730 |
| 54  | 8 | 0 | 0. 272542  | -5. 102951 | -1. 825632 |
| 55  | 8 | 0 | -6. 492605 | 0. 440944  | -1. 652877 |
| 56  | 6 | 0 | -7. 417486 | -0. 458246 | -2. 299672 |
| 57  | 1 | 0 | 3. 086158  | 3. 076361  | -1. 194516 |
| 58  | 1 | 0 | 3. 164070  | 3. 057697  | 1. 826518  |
| 59  | 1 | 0 | 4. 265864  | 2. 313909  | 0. 710657  |
| 60  | 1 | 0 | -0. 651828 | 2. 482036  | 0. 191079  |
| 61  | 1 | 0 | 0. 721989  | 4. 049398  | -1. 057533 |
| 62  | 1 | 0 | 2. 742273  | 5. 433906  | -0. 991604 |
| 63  | 1 | 0 | 4. 983625  | 6. 072832  | -0. 239038 |
| 64  | 1 | 0 | 5. 074443  | 4. 538040  | -1. 088069 |
| 65  | 1 | 0 | 5. 152275  | 4. 583815  | 0. 670342  |
| 66  | 1 | 0 | 2. 852314  | 6. 678275  | 1. 092222  |
| 67  | 1 | 0 | 1. 545455  | 5. 511034  | 1. 219455  |
| 68  | 1 | 0 | 3. 078650  | 5. 218434  | 2. 030291  |
| 69  | 1 | 0 | 3. 869914  | -1. 825270 | 0. 793639  |
| 70  | 1 | 0 | 4. 594229  | -0. 390929 | 1. 470135  |
| 71  | 1 | 0 | 6. 042585  | -2. 483791 | 0. 872116  |
| 72  | 1 | 0 | 6. 985966  | -2. 513411 | -1. 419433 |
| 73  | 1 | 0 | 5. 325672  | -2. 155491 | -3. 081950 |
| 74  | 1 | 0 | 2. 512841  | 0. 185628  | -3. 009275 |
| 75  | 1 | 0 | 4. 223049  | 0. 521012  | -3. 286334 |
| 76  | 1 | 0 | 3. 475098  | -0. 926838 | -3. 957505 |
| 77  | 1 | 0 | 6. 915798  | -0. 436821 | 1. 815078  |
| 78  | 1 | 0 | 9. 238237  | -0. 810760 | 1. 189063  |
| 79  | 1 | 0 | 8. 411445  | -2. 359644 | 1. 203513  |
| 80  | 1 | 0 | 8. 773925  | -1. 561308 | -0. 323534 |
| 81  | 1 | 0 | 8. 093184  | 1. 226772  | 0. 337676  |
| 82  | 1 | 0 | 7. 307238  | 0. 501928  | -1. 057645 |
| 83  | 1 | 0 | 6. 354153  | 1. 305529  | 0. 184696  |
| 84  | 1 | 0 | -0. 973553 | -4. 566663 | -0. 880450 |
| 85  | 1 | 0 | -5. 713779 | -2. 078293 | -1. 438240 |
| 86  | 1 | 0 | -1. 367209 | -2. 685488 | 2. 879950  |
| 87  | 1 | 0 | -2. 434258 | -3. 491123 | 1. 762304  |
| 88  | 1 | 0 | -4. 333874 | -2. 113914 | 2. 586532  |
| 89  | 1 | 0 | -4. 047608 | -0. 825648 | 4. 719235  |
| 90  | 1 | 0 | -2. 310655 | -1. 075931 | 4. 618916  |
| 91  | 1 | 0 | -3. 135805 | -0. 098292 | 3. 409541  |
| 92  | 1 | 0 | -2. 899072 | -3. 485108 | -0. 272105 |
| 93  | 1 | 0 | -3. 090672 | 2. 104693  | 1. 170016  |
| 94  | 1 | 0 | -4. 539878 | -3. 281070 | 4. 775561  |
| 95  | 1 | 0 | -3. 874775 | -4. 359502 | 3. 556397  |
| 96  | 1 | 0 | -2. 815545 | -3. 625743 | 4. 756045  |
| 97  | 1 | 0 | -5. 104128 | 4. 189865  | -1. 226909 |
| 98  | 1 | 0 | -5. 727248 | 3. 570266  | -3. 496577 |
| 99  | 1 | 0 | -4. 197428 | 2. 824483  | -3. 073307 |
| 100 | 1 | 0 | -5. 675401 | 1. 863465  | -3. 091473 |
| 101 | 1 | 0 | -7. 477699 | 2. 317792  | -1. 097034 |
| 102 | 1 | 0 | -7. 508106 | 3. 980796  | -1. 682121 |
| 103 | 1 | 0 | -7. 122910 | 3. 653199  | -0. 001113 |
| 104 | 1 | 0 | 1. 123824  | 1. 376515  | 3. 464722  |
| 105 | 1 | 0 | 1. 198722  | 3. 048399  | 2. 883208  |
| 106 | 1 | 0 | -0. 332171 | 2. 175723  | 2. 892374  |
| 107 | 1 | 0 | 1. 996621  | -4. 184644 | -2. 282949 |
| 108 | 1 | 0 | -8. 181021 | 0. 176423  | -2. 716968 |
| 109 | 1 | 0 | -6. 929691 | -1. 015785 | -3. 086993 |
| 110 | 1 | 0 | -7. 853418 | -1. 141119 | -1. 583838 |



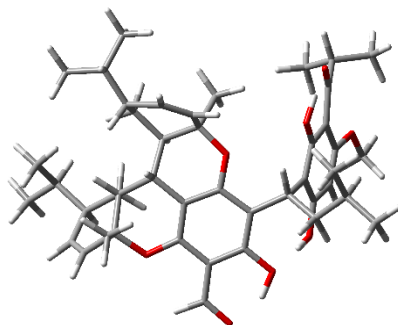

Optimized structure of 2

**Standard orientation:**

| Center Number | Atomic Number | Atomic Type | Coordinates (Angstroms) |           |           |
|---------------|---------------|-------------|-------------------------|-----------|-----------|
|               |               |             | X                       | Y         | Z         |
| 1             | 6             | 0           | -3.349581               | -2.606685 | -2.120554 |
| 2             | 6             | 0           | -2.926997               | -2.509602 | -0.642750 |
| 3             | 6             | 0           | -1.954794               | -1.347334 | -0.355777 |
| 4             | 6             | 0           | -0.679131               | -1.546375 | -1.196099 |
| 5             | 6             | 0           | -1.021547               | -1.820104 | -2.641176 |
| 6             | 6             | 0           | -2.193540               | -2.301797 | -3.039025 |
| 7             | 6             | 0           | -2.581631               | 0.034608  | -0.626485 |
| 8             | 6             | 0           | -1.540695               | 1.120720  | -0.516079 |
| 9             | 6             | 0           | -0.196245               | 0.854879  | -0.822153 |
| 10            | 8             | 0           | 0.201098                | -0.378291 | -1.176787 |
| 11            | 1             | 0           | -1.657869               | -1.393663 | 0.694925  |
| 12            | 6             | 0           | -1.880023               | 2.406530  | -0.125883 |
| 13            | 6             | 0           | -0.900043               | 3.421217  | -0.032964 |
| 14            | 6             | 0           | 0.440865                | 3.096150  | -0.371703 |
| 15            | 6             | 0           | 0.829329                | 1.828913  | -0.787286 |
| 16            | 6             | 0           | -4.038036               | -3.948942 | -2.500321 |
| 17            | 6             | 0           | -5.346875               | -4.161071 | -1.731256 |
| 18            | 6             | 0           | -3.121801               | -5.172125 | -2.373245 |
| 19            | 8             | 0           | -3.139509               | 2.758173  | 0.224628  |
| 20            | 6             | 0           | -4.246840               | 1.832508  | -0.037745 |
| 21            | 6             | 0           | -3.810089               | 0.381767  | 0.249181  |
| 22            | 6             | 0           | -3.586625               | 0.179397  | 1.757392  |
| 23            | 6             | 0           | -4.793060               | 0.546683  | 2.652611  |
| 24            | 6             | 0           | -5.581868               | 1.689540  | 2.079011  |
| 25            | 6             | 0           | -5.334761               | 2.270722  | 0.911680  |
| 26            | 1             | 0           | -2.932955               | 0.015391  | -1.662499 |
| 27            | 6             | 0           | -4.699847               | 2.054215  | -1.483038 |
| 28            | 1             | 0           | -4.643065               | -0.246106 | -0.073259 |
| 29            | 6             | 0           | -5.678505               | -0.667254 | 3.068907  |
| 30            | 6             | 0           | -6.454782               | -1.306621 | 1.912458  |
| 31            | 6             | 0           | -6.632278               | -0.306410 | 4.216093  |
| 32            | 8             | 0           | 1.374875                | 4.069568  | -0.257762 |
| 33            | 6             | 0           | 2.249454                | 1.440804  | -1.225685 |
| 34            | 6             | 0           | 3.098321                | 0.835894  | -0.102084 |
| 35            | 6             | 0           | 3.482881                | 1.525472  | 1.050418  |
| 36            | 6             | 0           | 4.292067                | 0.928408  | 2.030854  |
| 37            | 6             | 0           | 4.705767                | -0.376444 | 1.908877  |
| 38            | 6             | 0           | 4.327816                | -1.165952 | 0.783620  |
| 39            | 6             | 0           | 3.579261                | -0.481368 | -0.238743 |
| 40            | 6             | 0           | 3.006333                | 2.525553  | -2.038394 |
| 41            | 6             | 0           | 4.149506                | 1.979724  | -2.914787 |
| 42            | 6             | 0           | 3.643393                | 1.139358  | -4.093186 |
| 43            | 8             | 0           | 3.161507                | 2.801104  | 1.323525  |
| 44            | 8             | 0           | 3.306961                | -1.110726 | -1.384519 |
| 45            | 6             | 0           | 5.017427                | 3.140009  | -3.418582 |
| 46            | 6             | 0           | 4.610768                | -2.590379 | 0.589461  |
| 47            | 6             | 0           | 5.043399                | -3.615435 | 1.653187  |
| 48            | 8             | 0           | 4.420220                | -3.102940 | -0.534527 |
| 49            | 6             | 0           | 6.562147                | -3.623926 | 1.896312  |
| 50            | 6             | 0           | 4.204778                | -3.631190 | 2.938599  |
| 51            | 6             | 0           | 0.219661                | -2.652699 | -0.631536 |
| 52            | 1             | 0           | 2.089123                | 0.616641  | -1.912771 |
| 53            | 6             | 0           | -1.228221               | 4.748504  | 0.409168  |
| 54            | 8             | 0           | -0.403106               | 5.665631  | 0.522517  |
| 55            | 8             | 0           | 5.529067                | -0.951276 | 2.824357  |
| 56            | 6             | 0           | 5.951595                | -0.190383 | 3.948642  |
| 57            | 1             | 0           | -4.111620               | -1.836191 | -2.309318 |

|     |   |   |           |           |           |
|-----|---|---|-----------|-----------|-----------|
| 58  | 1 | 0 | -2.448338 | -3.441692 | -0.338546 |
| 59  | 1 | 0 | -3.810045 | -2.408628 | -0.009804 |
| 60  | 1 | 0 | -0.228312 | -1.619439 | -3.353253 |
| 61  | 1 | 0 | -2.358679 | -2.481099 | -4.098638 |
| 62  | 1 | 0 | -4.298086 | -3.850848 | -3.561493 |
| 63  | 1 | 0 | -5.875655 | -5.040236 | -2.106255 |
| 64  | 1 | 0 | -6.016419 | -3.302884 | -1.833272 |
| 65  | 1 | 0 | -5.166968 | -4.321807 | -0.665365 |
| 66  | 1 | 0 | -3.615792 | -6.058296 | -2.778146 |
| 67  | 1 | 0 | -2.185437 | -5.034565 | -2.917385 |
| 68  | 1 | 0 | -2.875722 | -5.390184 | -1.331136 |
| 69  | 1 | 0 | -3.310480 | -0.857933 | 1.956574  |
| 70  | 1 | 0 | -2.729287 | 0.784308  | 2.062375  |
| 71  | 1 | 0 | -4.375801 | 0.914827  | 3.598882  |
| 72  | 1 | 0 | -6.389338 | 2.080818  | 2.690041  |
| 73  | 1 | 0 | -5.923964 | 3.125959  | 0.595746  |
| 74  | 1 | 0 | -3.899803 | 1.856857  | -2.196146 |
| 75  | 1 | 0 | -5.546326 | 1.405812  | -1.719376 |
| 76  | 1 | 0 | -5.015598 | 3.090433  | -1.612705 |
| 77  | 1 | 0 | -4.979932 | -1.418376 | 3.456535  |
| 78  | 1 | 0 | -7.135977 | -0.589151 | 1.447869  |
| 79  | 1 | 0 | -5.793596 | -1.692487 | 1.135073  |
| 80  | 1 | 0 | -7.053430 | -2.146370 | 2.273307  |
| 81  | 1 | 0 | -6.098752 | 0.150861  | 5.053156  |
| 82  | 1 | 0 | -7.410298 | 0.389598  | 3.893364  |
| 83  | 1 | 0 | -7.135373 | -1.200339 | 4.591457  |
| 84  | 1 | 0 | 0.896274  | 4.891779  | 0.073661  |
| 85  | 1 | 0 | 4.580871  | 1.548880  | 2.863951  |
| 86  | 1 | 0 | 3.416616  | 3.287997  | -1.377035 |
| 87  | 1 | 0 | 2.289009  | 3.044364  | -2.683464 |
| 88  | 1 | 0 | 4.781292  | 1.338145  | -2.290587 |
| 89  | 1 | 0 | 2.986425  | 1.732337  | -4.737983 |
| 90  | 1 | 0 | 3.094705  | 0.258520  | -3.759277 |
| 91  | 1 | 0 | 4.478416  | 0.788798  | -4.705323 |
| 92  | 1 | 0 | 2.598423  | 3.230777  | 0.649972  |
| 93  | 1 | 0 | 3.760295  | -2.011458 | -1.312066 |
| 94  | 1 | 0 | 5.435848  | 3.714627  | -2.588525 |
| 95  | 1 | 0 | 4.430828  | 3.828103  | -4.035591 |
| 96  | 1 | 0 | 5.848483  | 2.776524  | -4.028234 |
| 97  | 1 | 0 | 4.821030  | -4.547271 | 1.127954  |
| 98  | 1 | 0 | 6.824354  | -4.481220 | 2.521663  |
| 99  | 1 | 0 | 7.098413  | -3.727932 | 0.950644  |
| 100 | 1 | 0 | 6.905465  | -2.718606 | 2.389987  |
| 101 | 1 | 0 | 3.137226  | -3.645616 | 2.706224  |
| 102 | 1 | 0 | 4.403673  | -2.779188 | 3.582402  |
| 103 | 1 | 0 | 4.429600  | -4.541915 | 3.499956  |
| 104 | 1 | 0 | -0.275876 | -3.621764 | -0.669541 |
| 105 | 1 | 0 | 1.140350  | -2.709202 | -1.210234 |
| 106 | 1 | 0 | 0.485770  | -2.423726 | 0.402431  |
| 107 | 1 | 0 | -2.279174 | 4.939781  | 0.660592  |
| 108 | 1 | 0 | 5.101548  | 0.123413  | 4.560041  |
| 109 | 1 | 0 | 6.591147  | -0.852856 | 4.528150  |
| 110 | 1 | 0 | 6.522146  | 0.688695  | 3.639230  |

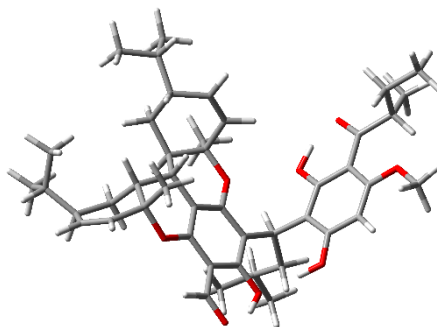

Optimized structure of 3-8''S

**Standard orientation:**

| Center Number | Atomic Number | Atomic Type | Coordinates (Angstroms) |           |           |
|---------------|---------------|-------------|-------------------------|-----------|-----------|
|               |               |             | X                       | Y         | Z         |
| 1             | 6             | 0           | 2.812381                | 3.480572  | 0.087974  |
| 2             | 6             | 0           | 3.456260                | 2.385937  | 0.972327  |
| 3             | 6             | 0           | 2.638977                | 1.074902  | 0.995159  |
| 4             | 6             | 0           | 1.242244                | 1.395838  | 1.547846  |
| 5             | 6             | 0           | 0.599657                | 2.517588  | 0.777073  |
| 6             | 6             | 0           | 1.298454                | 3.450106  | 0.164728  |
| 7             | 6             | 0           | 2.509081                | 0.445746  | -0.410869 |
| 8             | 6             | 0           | 1.495310                | -0.681201 | -0.420154 |
| 9             | 6             | 0           | 0.432533                | -0.690916 | 0.475536  |
| 10            | 8             | 0           | 0.368228                | 0.227658  | 1.463783  |
| 11            | 1             | 0           | 3.104020                | 0.365950  | 1.667091  |
| 12            | 6             | 0           | 1.589818                | -1.702436 | -1.334486 |
| 13            | 6             | 0           | 0.640016                | -2.721149 | -1.359422 |
| 14            | 6             | 0           | -0.438598               | -2.670198 | -0.463263 |
| 15            | 6             | 0           | -0.579308               | -1.658437 | 0.456315  |
| 16            | 6             | 0           | 3.350757                | 4.909104  | 0.388108  |
| 17            | 6             | 0           | 4.868200                | 5.008430  | 0.136843  |
| 18            | 6             | 0           | 3.008055                | 5.400646  | 1.807509  |
| 19            | 8             | 0           | 2.611000                | -1.795889 | -2.223560 |
| 20            | 6             | 0           | 3.578854                | -0.699493 | -2.382804 |
| 21            | 6             | 0           | 3.850051                | -0.036635 | -1.019989 |
| 22            | 6             | 0           | 4.607657                | -1.015946 | -0.101297 |
| 23            | 6             | 0           | 5.937756                | -1.543967 | -0.695573 |
| 24            | 6             | 0           | 5.848111                | -1.710349 | -2.192804 |
| 25            | 6             | 0           | 4.819194                | -1.358675 | -2.932612 |
| 26            | 1             | 0           | 2.128313                | 1.225716  | -1.053774 |
| 27            | 6             | 0           | 2.999968                | 0.268216  | -3.419642 |
| 28            | 1             | 0           | 4.467764                | 0.826663  | -1.221260 |
| 29            | 6             | 0           | 7.216676                | -0.741094 | -0.312053 |
| 30            | 6             | 0           | 7.538708                | -0.863290 | 1.190762  |
| 31            | 6             | 0           | 7.166431                | 0.739296  | -0.729194 |
| 32            | 8             | 0           | -1.368354               | -3.671385 | -0.515968 |
| 33            | 6             | 0           | -1.760548               | -1.551022 | 1.422443  |
| 34            | 6             | 0           | -3.063893               | -1.185276 | 0.702558  |
| 35            | 6             | 0           | -3.987322               | -2.099269 | 0.223770  |
| 36            | 6             | 0           | -5.196862               | -1.680495 | -0.322300 |
| 37            | 6             | 0           | -5.509480               | -0.356271 | -0.417836 |
| 38            | 6             | 0           | -4.611879               | 0.625945  | 0.045877  |
| 39            | 6             | 0           | -3.393785               | 0.167220  | 0.609392  |
| 40            | 6             | 0           | -1.908533               | -2.783557 | 2.370850  |
| 41            | 6             | 0           | -1.160441               | -2.637041 | 3.716848  |
| 42            | 6             | 0           | 0.371670                | -2.644493 | 3.560022  |
| 43            | 8             | 0           | -3.817316               | -3.438147 | 0.277398  |
| 44            | 8             | 0           | -2.502272               | 1.042407  | 1.119628  |
| 45            | 6             | 0           | -1.586946               | -3.782311 | 4.657841  |
| 46            | 6             | 0           | -4.871368               | 2.073829  | 0.003626  |
| 47            | 6             | 0           | -6.091940               | 2.656601  | -0.695635 |
| 48            | 8             | 0           | -4.096191               | 2.869423  | 0.556716  |
| 49            | 6             | 0           | -6.354427               | 4.081564  | -0.191225 |
| 50            | 6             | 0           | -5.802710               | 2.633569  | -2.221533 |
| 51            | 6             | 0           | 1.232029                | 1.698079  | 3.050186  |
| 52            | 1             | 0           | -1.554429               | -0.694523 | 2.039245  |
| 53            | 6             | 0           | -7.043861               | 2.975835  | -3.065351 |
| 54            | 6             | 0           | 0.761071                | -3.811884 | -2.293439 |
| 55            | 8             | 0           | -0.028088               | -4.759595 | -2.342949 |
| 56            | 8             | 0           | -6.680629               | 0.053955  | -0.979267 |
| 57            | 6             | 0           | -7.708868               | -0.887711 | -1.344710 |

|     |   |   |           |           |           |
|-----|---|---|-----------|-----------|-----------|
| 58  | 1 | 0 | 3.075400  | 3.278010  | -0.949159 |
| 59  | 1 | 0 | 3.548831  | 2.747089  | 1.986988  |
| 60  | 1 | 0 | 4.459237  | 2.179777  | 0.622935  |
| 61  | 1 | 0 | -0.471685 | 2.503452  | 0.777916  |
| 62  | 1 | 0 | 0.788329  | 4.240359  | -0.357748 |
| 63  | 1 | 0 | 2.857481  | 5.572468  | -0.317444 |
| 64  | 1 | 0 | 5.198595  | 6.036833  | 0.235034  |
| 65  | 1 | 0 | 5.122598  | 4.667428  | -0.861800 |
| 66  | 1 | 0 | 5.420578  | 4.412525  | 0.854445  |
| 67  | 1 | 0 | 3.269164  | 6.448704  | 1.908544  |
| 68  | 1 | 0 | 1.950522  | 5.292963  | 2.014719  |
| 69  | 1 | 0 | 3.563758  | 4.850812  | 2.558243  |
| 70  | 1 | 0 | 4.809838  | -0.541563 | 0.846871  |
| 71  | 1 | 0 | 3.959386  | -1.859744 | 0.097864  |
| 72  | 1 | 0 | 6.090930  | -2.542169 | -0.291022 |
| 73  | 1 | 0 | 6.698436  | -2.174580 | -2.661097 |
| 74  | 1 | 0 | 4.814307  | -1.552371 | -3.988587 |
| 75  | 1 | 0 | 2.050487  | 0.672994  | -3.099169 |
| 76  | 1 | 0 | 3.693827  | 1.082024  | -3.594742 |
| 77  | 1 | 0 | 2.840016  | -0.262239 | -4.349748 |
| 78  | 1 | 0 | 8.035646  | -1.208314 | -0.853262 |
| 79  | 1 | 0 | 8.489811  | -0.389981 | 1.409549  |
| 80  | 1 | 0 | 7.603154  | -1.903627 | 1.491827  |
| 81  | 1 | 0 | 6.781803  | -0.378849 | 1.796169  |
| 82  | 1 | 0 | 8.130975  | 1.205663  | -0.558627 |
| 83  | 1 | 0 | 6.920707  | 0.843805  | -1.779176 |
| 84  | 1 | 0 | 6.432191  | 1.279749  | -0.144054 |
| 85  | 1 | 0 | -1.142971 | -4.329160 | -1.222082 |
| 86  | 1 | 0 | -5.851270 | -2.444341 | -0.675216 |
| 87  | 1 | 0 | -1.580079 | -3.690438 | 1.884569  |
| 88  | 1 | 0 | -2.960426 | -2.905070 | 2.593741  |
| 89  | 1 | 0 | -1.453840 | -1.694070 | 4.169233  |
| 90  | 1 | 0 | 0.850254  | -2.603542 | 4.533997  |
| 91  | 1 | 0 | 0.704676  | -1.794776 | 2.985008  |
| 92  | 1 | 0 | 0.694339  | -3.552611 | 3.060194  |
| 93  | 1 | 0 | -2.886656 | -3.716163 | 0.125551  |
| 94  | 1 | 0 | -2.884608 | 1.952837  | 1.089346  |
| 95  | 1 | 0 | -2.657144 | -3.762967 | 4.833582  |
| 96  | 1 | 0 | -1.083256 | -3.702671 | 5.615661  |
| 97  | 1 | 0 | -1.331568 | -4.742513 | 4.219633  |
| 98  | 1 | 0 | -6.940245 | 2.025854  | -0.509402 |
| 99  | 1 | 0 | -7.242174 | 4.485466  | -0.662668 |
| 100 | 1 | 0 | -6.509069 | 4.090269  | 0.881089  |
| 101 | 1 | 0 | -5.513105 | 4.723183  | -0.410079 |
| 102 | 1 | 0 | -5.004224 | 3.337030  | -2.431607 |
| 103 | 1 | 0 | -5.459887 | 1.646853  | -2.503110 |
| 104 | 1 | 0 | 1.666328  | 0.867105  | 3.592282  |
| 105 | 1 | 0 | 1.771041  | 2.606911  | 3.274370  |
| 106 | 1 | 0 | 0.203443  | 1.812738  | 3.363746  |
| 107 | 1 | 0 | -6.807082 | 2.922205  | -4.122777 |
| 108 | 1 | 0 | -7.838527 | 2.266975  | -2.859820 |
| 109 | 1 | 0 | -7.408543 | 3.973779  | -2.854666 |
| 110 | 1 | 0 | 1.614699  | -3.776228 | -2.949416 |
| 111 | 1 | 0 | -8.580261 | -0.289836 | -1.554268 |
| 112 | 1 | 0 | -7.421395 | -1.440382 | -2.228757 |
| 113 | 1 | 0 | -7.914372 | -1.574318 | -0.535566 |

Computational data for **3-8''R**

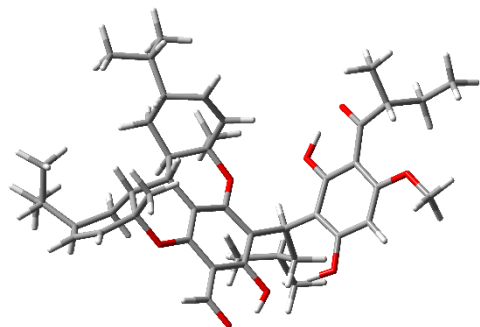

Optimized structure of **3-8''R**

**Standard orientation:**

| Center Number | Atomic Number | Atomic Type | Coordinates (Angstroms) |           |           |
|---------------|---------------|-------------|-------------------------|-----------|-----------|
|               |               |             | X                       | Y         | Z         |
| 1             | 6             | 0           | 3.048851                | 3.447053  | 0.270924  |
| 2             | 6             | 0           | 3.611028                | 2.254188  | 1.067909  |
| 3             | 6             | 0           | 2.712248                | 1.004710  | 1.019970  |
| 4             | 6             | 0           | 1.332809                | 1.359296  | 1.599165  |
| 5             | 6             | 0           | 0.780683                | 2.600320  | 0.935985  |
| 6             | 6             | 0           | 1.542973                | 3.524553  | 0.382859  |
| 7             | 6             | 0           | 2.559972                | 0.438324  | -0.403868 |
| 8             | 6             | 0           | 1.498262                | -0.637118 | -0.433871 |
| 9             | 6             | 0           | 0.431453                | -0.618186 | 0.469005  |
| 10            | 8             | 0           | 0.389884                | 0.294404  | 1.436231  |
| 11            | 1             | 0           | 3.141246                | 0.240757  | 1.659644  |
| 12            | 6             | 0           | 1.546675                | -1.662346 | -1.354481 |
| 13            | 6             | 0           | 0.562027                | -2.661998 | -1.392138 |
| 14            | 6             | 0           | -0.499184               | -2.579606 | -0.467833 |
| 15            | 6             | 0           | -0.607998               | -1.560435 | 0.463762  |
| 16            | 6             | 0           | 3.710865                | 4.807105  | 0.610837  |
| 17            | 6             | 0           | 5.212646                | 4.805694  | 0.306219  |
| 18            | 6             | 0           | 3.449745                | 5.292200  | 2.041611  |
| 19            | 8             | 0           | 2.550130                | -1.785493 | -2.230189 |
| 20            | 6             | 0           | 3.509056                | -0.729632 | -2.413444 |
| 21            | 6             | 0           | 3.859663                | -0.078975 | -1.063204 |
| 22            | 6             | 0           | 4.670616                | -1.049495 | -0.188200 |
| 23            | 6             | 0           | 5.956933                | -1.595637 | -0.847193 |
| 24            | 6             | 0           | 5.780914                | -1.767718 | -2.332908 |
| 25            | 6             | 0           | 4.714152                | -1.409643 | -3.018283 |
| 26            | 1             | 0           | 2.212321                | 1.257695  | -1.020575 |
| 27            | 6             | 0           | 2.921680                | 0.258387  | -3.423675 |
| 28            | 1             | 0           | 4.479855                | 0.777648  | -1.299120 |
| 29            | 6             | 0           | 7.278875                | -0.846379 | -0.526687 |
| 30            | 6             | 0           | 7.673210                | -0.977484 | 0.948728  |
| 31            | 6             | 0           | 7.304631                | 0.621272  | -0.963962 |
| 32            | 8             | 0           | -1.442414               | -3.528245 | -0.475531 |
| 33            | 6             | 0           | -1.786261               | -1.446224 | 1.439929  |
| 34            | 6             | 0           | -3.134727               | -1.173270 | 0.739640  |
| 35            | 6             | 0           | -4.111330               | -2.114638 | 0.441466  |
| 36            | 6             | 0           | -5.372851               | -1.759896 | -0.046084 |
| 37            | 6             | 0           | -5.667886               | -0.450010 | -0.314930 |
| 38            | 6             | 0           | -4.698583               | 0.563429  | -0.121766 |
| 39            | 6             | 0           | -3.466827               | 0.162046  | 0.452497  |
| 40            | 6             | 0           | -1.854634               | -2.561673 | 2.521329  |
| 41            | 6             | 0           | -0.910390               | -2.378951 | 3.727919  |
| 42            | 6             | 0           | 0.541836                | -2.776410 | 3.440900  |
| 43            | 8             | 0           | -3.953011               | -3.427862 | 0.633925  |
| 44            | 8             | 0           | -2.537443               | 1.064366  | 0.744961  |
| 45            | 6             | 0           | -1.437076               | -3.193083 | 4.916477  |
| 46            | 6             | 0           | -4.889903               | 1.984644  | -0.496657 |
| 47            | 6             | 0           | -5.920188               | 2.446726  | -1.525724 |
| 48            | 8             | 0           | -4.174407               | 2.845929  | -0.022539 |
| 49            | 6             | 0           | -5.239164               | 3.409458  | -2.508145 |
| 50            | 6             | 0           | -7.100091               | 3.100559  | -0.778476 |
| 51            | 6             | 0           | 1.359964                | 1.544474  | 3.119054  |

|     |   |   |           |           |           |
|-----|---|---|-----------|-----------|-----------|
| 52  | 1 | 0 | -1.602324 | -0.539612 | 1.988259  |
| 53  | 6 | 0 | -8.284903 | 3.451070  | -1.679108 |
| 54  | 6 | 0 | 0.641249  | -3.742413 | -2.362038 |
| 55  | 8 | 0 | -0.161899 | -4.643113 | -2.454392 |
| 56  | 8 | 0 | -6.880506 | -0.067323 | -0.742215 |
| 57  | 6 | 0 | -7.902438 | -1.012974 | -0.923250 |
| 58  | 1 | 0 | 3.269506  | 3.279601  | -0.783936 |
| 59  | 1 | 0 | 3.749701  | 2.537258  | 2.103915  |
| 60  | 1 | 0 | 4.597491  | 2.002338  | 0.698189  |
| 61  | 1 | 0 | -0.288619 | 2.707292  | 0.966927  |
| 62  | 1 | 0 | 1.076348  | 4.394863  | -0.050820 |
| 63  | 1 | 0 | 3.250672  | 5.531482  | -0.059436 |
| 64  | 1 | 0 | 5.624047  | 5.804758  | 0.412267  |
| 65  | 1 | 0 | 5.412042  | 4.473661  | -0.708900 |
| 66  | 1 | 0 | 5.760374  | 4.157188  | 0.983398  |
| 67  | 1 | 0 | 3.821457  | 6.304779  | 2.165738  |
| 68  | 1 | 0 | 2.391272  | 5.298107  | 2.277878  |
| 69  | 1 | 0 | 3.953678  | 4.674094  | 2.778237  |
| 70  | 1 | 0 | 4.925551  | -0.566535 | 0.745750  |
| 71  | 1 | 0 | 4.037511  | -1.890855 | 0.072808  |
| 72  | 1 | 0 | 6.105995  | -2.598677 | -0.450160 |
| 73  | 1 | 0 | 6.594728  | -2.247253 | -2.853659 |
| 74  | 1 | 0 | 4.659069  | -1.617053 | -4.073598 |
| 75  | 1 | 0 | 1.980147  | 0.672779  | -3.087366 |
| 76  | 1 | 0 | 3.615117  | 1.073125  | -3.605000 |
| 77  | 1 | 0 | 2.739825  | -0.249794 | -4.363767 |
| 78  | 1 | 0 | 8.047458  | -1.361683 | -1.101123 |
| 79  | 1 | 0 | 8.663790  | -0.565118 | 1.114809  |
| 80  | 1 | 0 | 7.691820  | -2.016896 | 1.262565  |
| 81  | 1 | 0 | 6.989499  | -0.445220 | 1.602845  |
| 82  | 1 | 0 | 8.301963  | 1.032156  | -0.839841 |
| 83  | 1 | 0 | 7.028187  | 0.735963  | -2.006515 |
| 84  | 1 | 0 | 6.632132  | 1.228807  | -0.366754 |
| 85  | 1 | 0 | -1.262190 | -4.162687 | -1.177484 |
| 86  | 1 | 0 | -6.073633 | -2.552814 | -0.201014 |
| 87  | 1 | 0 | -1.676082 | -3.545820 | 2.102218  |
| 88  | 1 | 0 | -2.869140 | -2.573747 | 2.903348  |
| 89  | 1 | 0 | -0.923790 | -1.329448 | 4.015670  |
| 90  | 1 | 0 | 1.151737  | -2.659850 | 4.332940  |
| 91  | 1 | 0 | 0.985596  | -2.176887 | 2.658123  |
| 92  | 1 | 0 | 0.602412  | -3.818506 | 3.136233  |
| 93  | 1 | 0 | -3.037487 | -3.661706 | 0.525397  |
| 94  | 1 | 0 | -2.903267 | 1.942675  | 0.611612  |
| 95  | 1 | 0 | -2.436195 | -2.877583 | 5.201083  |
| 96  | 1 | 0 | -0.793349 | -3.081094 | 5.784307  |
| 97  | 1 | 0 | -1.481238 | -4.252171 | 4.673797  |
| 98  | 1 | 0 | -6.288452 | 1.597774  | -2.078085 |
| 99  | 1 | 0 | -5.923683 | 3.685243  | -3.302584 |
| 100 | 1 | 0 | -4.375310 | 2.942988  | -2.972006 |
| 101 | 1 | 0 | -4.904662 | 4.309900  | -2.009650 |
| 102 | 1 | 0 | -6.740202 | 3.993774  | -0.276350 |
| 103 | 1 | 0 | -7.443632 | 2.423370  | -0.003492 |
| 104 | 1 | 0 | 1.734729  | 0.647498  | 3.600294  |
| 105 | 1 | 0 | 1.973601  | 2.386868  | 3.407917  |
| 106 | 1 | 0 | 0.352190  | 1.724427  | 3.473974  |
| 107 | 1 | 0 | -8.028964 | 4.201940  | -2.418629 |
| 108 | 1 | 0 | -8.647850 | 2.573597  | -2.207307 |
| 109 | 1 | 0 | -9.106795 | 3.844034  | -1.088427 |
| 110 | 1 | 0 | 1.494146  | -3.720099 | -3.031770 |
| 111 | 1 | 0 | -8.766140 | -0.454480 | -1.250848 |
| 112 | 1 | 0 | -7.635608 | -1.740416 | -1.680319 |
| 113 | 1 | 0 | -8.132777 | -1.521624 | 0.004836  |

Computational data for 4-R

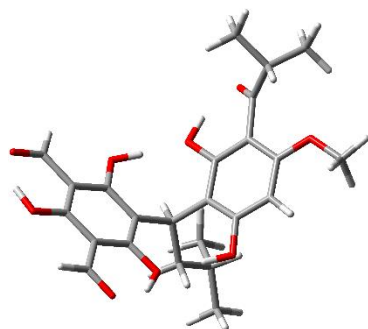

Optimized structure of 4-R

**Standard orientation:**

| Center Number | Atomic Number | Atomic Type | Coordinates (Angstroms) |           |           |
|---------------|---------------|-------------|-------------------------|-----------|-----------|
|               |               |             | X                       | Y         | Z         |
| 1             | 6             | 0           | -3.749998               | -0.303401 | -1.190324 |
| 2             | 6             | 0           | -4.022722               | -1.507677 | -0.542189 |
| 3             | 6             | 0           | -3.218378               | -1.908846 | 0.530574  |
| 4             | 6             | 0           | -2.146559               | -1.101391 | 0.950320  |
| 5             | 6             | 0           | -1.871978               | 0.146429  | 0.341524  |
| 6             | 6             | 0           | -2.681390               | 0.509868  | -0.754782 |
| 7             | 8             | 0           | -2.391427               | 1.682534  | -1.412068 |
| 8             | 8             | 0           | -5.074508               | -2.269925 | -0.986538 |
| 9             | 8             | 0           | -1.383604               | -1.580393 | 1.984845  |
| 10            | 6             | 0           | -0.748452               | 1.053227  | 0.879582  |
| 11            | 6             | 0           | -1.178282               | 2.525427  | 1.162218  |
| 12            | 6             | 0           | -0.139938               | 3.382010  | 1.927087  |
| 13            | 6             | 0           | 0.569836                | 0.860202  | 0.123284  |
| 14            | 6             | 0           | -0.652822               | 4.821063  | 2.046926  |
| 15            | 6             | 0           | 0.173725                | 2.836202  | 3.321257  |
| 16            | 6             | 0           | 0.933350                | 1.574818  | -1.023673 |
| 17            | 6             | 0           | 2.191008                | 1.432428  | -1.623194 |
| 18            | 6             | 0           | 3.127755                | 0.524038  | -1.129886 |
| 19            | 6             | 0           | 2.769483                | -0.271320 | -0.034473 |
| 20            | 6             | 0           | 1.517085                | -0.073072 | 0.596614  |
| 21            | 8             | 0           | 1.178284                | -0.806187 | 1.718648  |
| 22            | 8             | 0           | 0.117141                | 2.472556  | -1.647953 |
| 23            | 6             | 0           | 3.668513                | -1.322429 | 0.522552  |
| 24            | 6             | 0           | 4.477498                | -2.224470 | -0.401824 |
| 25            | 8             | 0           | 3.644288                | -1.493332 | 1.745796  |
| 26            | 6             | 0           | 4.075683                | -3.678961 | -0.156114 |
| 27            | 6             | 0           | 5.967331                | -2.026030 | -0.143321 |
| 28            | 6             | 0           | -3.484486               | -3.187439 | 1.224191  |
| 29            | 8             | 0           | -4.406625               | -3.911584 | 0.853353  |
| 30            | 6             | 0           | -4.595390               | 0.106358  | -2.331998 |
| 31            | 8             | 0           | -4.381820               | 1.172755  | -2.905901 |
| 32            | 8             | 0           | 4.389075                | 0.378431  | -1.637988 |
| 33            | 6             | 0           | 4.796187                | 1.262497  | -2.677082 |
| 34            | 1             | 0           | -3.078247               | 1.826841  | -2.110225 |
| 35            | 1             | 0           | -5.129988               | -3.086002 | -0.433201 |
| 36            | 1             | 0           | -0.458131               | -1.263489 | 1.894800  |
| 37            | 1             | 0           | -0.577339               | 0.706746  | 1.903466  |
| 38            | 1             | 0           | -1.431771               | 3.060776  | 0.244804  |
| 39            | 1             | 0           | -2.109851               | 2.503164  | 1.746174  |
| 40            | 1             | 0           | 0.794242                | 3.415800  | 1.354312  |
| 41            | 1             | 0           | 0.083130                | 5.456450  | 2.551111  |
| 42            | 1             | 0           | -0.839669               | 5.251711  | 1.057467  |
| 43            | 1             | 0           | -1.586266               | 4.864141  | 2.618440  |
| 44            | 1             | 0           | 0.827055                | 3.523680  | 3.869636  |
| 45            | 1             | 0           | 0.694895                | 1.876028  | 3.268128  |
| 46            | 1             | 0           | -0.740220               | 2.699038  | 3.908666  |

|    |   |   |           |           |           |
|----|---|---|-----------|-----------|-----------|
| 47 | 1 | 0 | 2.399043  | 2.056114  | -2.487932 |
| 48 | 1 | 0 | 2.020361  | -1.155579 | 2.104657  |
| 49 | 1 | 0 | -0.813383 | 2.201701  | -1.505260 |
| 50 | 1 | 0 | 4.251572  | -2.005268 | -1.449168 |
| 51 | 1 | 0 | 4.298813  | -3.991912 | 0.869965  |
| 52 | 1 | 0 | 3.000467  | -3.815885 | -0.315741 |
| 53 | 1 | 0 | 4.608636  | -4.349546 | -0.838199 |
| 54 | 1 | 0 | 6.234438  | -2.298977 | 0.883835  |
| 55 | 1 | 0 | 6.259450  | -0.980904 | -0.287372 |
| 56 | 1 | 0 | 6.564917  | -2.641972 | -0.823293 |
| 57 | 1 | 0 | -2.841173 | -3.469291 | 2.073252  |
| 58 | 1 | 0 | -5.412484 | -0.562253 | -2.648406 |
| 59 | 1 | 0 | 5.838416  | 1.033244  | -2.919019 |
| 60 | 1 | 0 | 4.202019  | 1.103322  | -3.582694 |
| 61 | 1 | 0 | 4.752293  | 2.306294  | -2.349371 |
